# Supplementary material for: Generation of a series of Bn fused oligo-naphthalenes (n = 1 to 3) from a B1-polycyclic aromatic hydrocarbon
Source: Royal Society of Chemistry journal article supplement (doi:10.1039/c8cc04701d), 2018-01-01
Supplement: c8cc04701d1.pdf [file c8cc04701d1.pdf]

**Generation of a series of B<sub>n</sub> fused oligo-naphthalenes (n = 1 to 3) from a B<sub>1</sub>-Polycyclic Aromatic Hydrocarbon.**

R. J. Kahan, D. L. Crossley, J. Cid, J. E. Radcliffe, A. W. Woodward, V. Fasano, S. Endres, G. F. S. Whitehead M. J. Ingleson\*

School of Chemistry, University of Manchester, Manchester, M13 9PL, UK.

**Table of Contents**

|                                 |     |
|---------------------------------|-----|
| General Considerations          | S2  |
| Synthetic Procedures            | S3  |
| NMR Spectra and Mass Spectra    | S9  |
| Crystallographic Details        | S23 |
| Photophysical Properties        | S27 |
| Electrochemical Properties      | S30 |
| Optimised Structure Coordinates | S33 |
| References                      | S41 |

## General Considerations

Unless otherwise stated, all manipulations were carried out using standard Schlenk techniques under argon, or in a MBraun UniLab glovebox, under an atmosphere of argon (< 0.1 ppm O<sub>2</sub>/H<sub>2</sub>O). All solvents were distilled from appropriate drying agents: dichloromethane (CaH<sub>2</sub>); 1,2-dichloroethane (CaH<sub>2</sub>); THF (potassium); toluene (potassium); and triethylamine (CaH<sub>2</sub>). All solvents were stored over 3 Å molecular sieves with the exception of toluene, which was stored over a potassium mirror. Unless otherwise stated all compounds were purchased from commercial sources and used as received. Solvents for column chromatography were of technical grade and used without further purification. Column chromatography was performed on silica gel (230-400 mesh).

NMR spectra were recorded on Bruker AvanceIII-400, Bruker AvanceII-500 or Bruker Ascend-400 spectrometers. Chemical shifts are reported as dimensionless  $\delta$  values and are frequency referenced relative to residual protio impurities in the NMR solvents for <sup>1</sup>H and <sup>13</sup>C{<sup>1</sup>H}, while <sup>11</sup>B shifts are referenced relative to external BF<sub>3</sub>-etherate. Coupling constants J are given in Hertz (Hz) as positive values regardless of their real individual signs. The multiplicity of the signals are indicated as “s”, “d”, “t”, “q”, “pent”, “sept” or “m” for singlet, doublet, triplet, quartet, pentet, septet or multiplet, respectively. Broad features in the <sup>11</sup>B NMR spectra are due to boron present in borosilicate glass. Carbon atoms directly bonded to boron are not always observed in the <sup>13</sup>C{<sup>1</sup>H} NMR spectra due to quadrupolar relaxation leading to signal broadening.

GCMS analysis was performed on an Agilent Technologies 7890A GC system equipped with an Agilent Technologies 5975C inertXL EI/CI MSD with triple axis detector. The column employed was an Agilent J&W HP-5ms ((5%-Phenyl)-methylpolysiloxane) of dimensions: length, 30 m; internal diameter, 0.250 mm; film, 0.25  $\mu$ m. MALDI-TOF analyses were performed using a Shimadzu Axima Confidence spectrometer using a 4k PPG as a calibration reference. 1  $\mu$ L of a solution of dopant NaI in THF (10 mg mL<sup>-1</sup>) was spotted onto a well of the MALDI plate and the solvent left to evaporate. Solutions were made up to 10 mg mL<sup>-1</sup> in DCM. A solution of matrix dithranol was made up to 10 mg mL<sup>-1</sup> in THF. 2  $\mu$ L of sample solution and 20  $\mu$ L of matrix solution were thoroughly mixed and 1  $\mu$ L of this solution was spotted onto a well with no dopant and 1  $\mu$ L spotted by a layered method with the NaI. The solvent was allowed to evaporate before being placed in the spectrometer. Samples were run in positive polarity mode in either linear or reflection mode. High resolution mass spectra (HRMS) were recorded on a Waters QTOF mass spectrometer.

Cyclic voltammetry was performed using a CH-Instrument 1110C Electrochemical/Analyzer potentiostat under a nitrogen flow. Measurements were made using a 1 mM analyte solution with 0.1 M tetra<sup>n</sup>butylammonium hexafluorophosphate (Fluka  $\geq$ 99.0 %) as the supporting electrolyte in THF that had been dried and degassed prior to use and obtained from a dry solvent system. A glassy carbon electrode served as the working electrode and a platinum wire as the counter electrode. An Ag/AgNO<sub>3</sub> non-aqueous reference electrode was used. All scans were calibrated against the ferrocene/ferrocenium (Fc/Fc<sup>+</sup>) redox couple, which in this work is taken to be 4.8 eV below vacuum.<sup>1</sup> The half-wave potential of the ferrocene/ferrocenium (Fc/Fc<sup>+</sup>) redox couple ( $E_{1/2, Fc, Fc^+}$ ) was estimated from  $E_{1/2, Fc, Fc^+} = (E_{ap} + E_{cp})/2$ , where  $E_{ap}$  and  $E_{cp}$  are the anodic and cathodic peak potentials, respectively.

All calculations were performed using the Gaussian09 series of programs.<sup>2</sup> Geometries were optimized with the DFT method using M06-2X functional<sup>3</sup> and 6-311G(d,p) as a basis set. All geometry optimizations were full, with no restrictions. In all cases, structures were confirmed as minima by frequency analysis and the absence of imaginary frequencies. Solvent effects of the dichloromethane were introduced using the self-consistent field approach, by means of the integral equation formalism polarizable continuum model (IEFPCM).<sup>4</sup> Full Cartesian coordinates and energies of the optimised structures are provided below.

## Synthetic Procedures

Compounds **G** and **H** were prepared according to literature methods.<sup>5</sup>

Note, the separation of **G** and **1** from Ph<sub>3</sub>CH can be problematic on scale resulting in significantly lower yields, therefore in the reactions reported herein Ph<sub>3</sub>CH is not separated from **G** or **1**. In contrast **2** can be readily separated from Ph<sub>3</sub>CH by column chromatography.

### Synthesis of 9-bromo-7-mesityl-7H-dinaphtho[1,8-bc:1',2'-e]borinine (**2**)

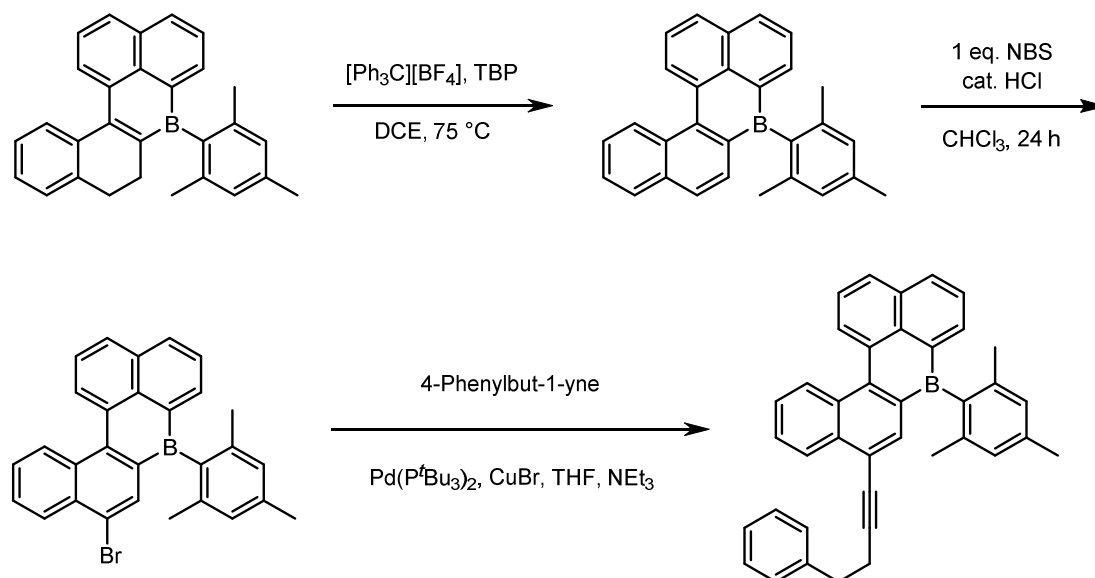

To a mixture of **H** (0.631 g, 1.64 mmol), tri-*tert*-butylpyridine (0.814 g, 3.29 mmol) and trityl tetrafluoroborate (1.085 g, 3.29 mmol) was added dry 1,2-dichloroethane (15 mL) to give a dark brown suspension which was refluxed at 75 °C for 24 hours. Once cool all volatiles were removed *in vacuo* and the residue containing **2** and triphenylmethane (generated as a side product from trityl tetrafluoroborate) was taken up in 50:50 DCM:Hexane and filtered through a silica plug. NMR spectroscopy confirmed full conversion of **H** to **G**.

In a 100 mL round-bottomed flask crude **G** and a small excess of N-bromosuccinimide (0.380 g, 2.14 mmol) were dissolved in wet chloroform (20 mL) and catalytic HCl (60 μL, 1.0 M in diethyl ether, 0.06 mmol) was added. The golden solution darkens slightly and was stirred at ambient temperature for 18 hours. Volatiles were removed *in vacuo* and the residue was taken up in hexane and filtered. NMR spectroscopy confirmed >95% conversion of **G** to **1** (minor double bromination product also observed, with meta C-H mesityl bromination at ca. 5% in addition).

In a Schlenk crude **1** was taken up in THF (15 mL) and triethylamine (4 mL). To the solution was added CuBr (7 mg, 0.05 mmol) and bis(tri-*tert*-butylphosphine)palladium(0) (13 mg, 0.025 mmol) to give a yellow solution. Under argon flow was added 4-phenylbut-1-yne (0.50 mL, 3.6 mmol) to form a bright yellow solution which darkens to red/black within 5 minutes. The mixture was stirred at ambient temperature for 72 hours after which NMR spectroscopy revealed full conversion **2**. The product was purified by flash column chromatography using a DCM:petrol eluent (10:90) to yield analytically pure product **2** at R<sub>f</sub> = 0.24 as a yellow solid (0.540 g, 1.06 mmol, 64% with respect to **1**).

Data for **1** / Ph<sub>3</sub>CH mixture:

<sup>1</sup>H NMR (400MHz, CD<sub>2</sub>Cl<sub>2</sub>) δ = 8.71 (d, 8.3 Hz, 1H), 8.59 (dd, 7.5, 1.2 Hz, 1H), 8.49 (dd, 8.5, 1.5 Hz, 1H), 8.36 (dd, 8.1, 1.5 Hz, 1H), 8.25 (dd, 6.8, 1.5 Hz, 1H), 8.16 (dd, 8.2, 1.2 Hz, 1H), 8.15 (s, 1H), 7.86 – 7.64 (m, 4H), 7.38 – 7.15 (m, 15H, Ph<sub>3</sub>CH aromatic H), 7.03 (s, 2H), 5.61 (s, 1H, Ph<sub>3</sub>C-H), 2.49 (s, 3H), 2.04 (s, 6H). <sup>11</sup>B NMR (128MHz, CD<sub>2</sub>Cl<sub>2</sub>) δ = 57.9 (ν<sub>2</sub> = 1858 Hz). <sup>13</sup>C{<sup>1</sup>H} NMR (101MHz, CDCl<sub>3</sub>) δ = 143.6, 142.0, 138.9, 137.0, 136.4, 136.0, 135.8, 134.2, 132.6, 132.2, 131.9, 131.3, 131.0, 130.8, 128.4, 127.5, 127.1, 126.4, 126.3, 125.2, 122.1, 23.4, 21.3.

Data for **2**: <sup>1</sup>H NMR (400MHz, CD<sub>2</sub>Cl<sub>2</sub>) δ = 8.67 (m, 1H), 8.59 (dd, 7.4, 1.4 Hz, 1H), 8.38 – 8.31 (m, 2H), 8.17 – 8.11 (m, 2H), 7.84 (s, 1H), 7.80 (dd, 8.0 Hz, 7.6 Hz, 1H), 7.73 (dd, 8.0 Hz, 6.8 Hz, 1H), 7.69-7.63 (m, 2H), 7.35-7.27 (m, 4H), 7.23 (m, 1H), 6.99 (s, 2H), 3.00 (t, 7.2 Hz, 2H), 2.86 (t, 7.1 Hz, 2H), 2.43 (s, 3H), 1.96 (s, 6H). <sup>11</sup>B NMR (128MHz, CD<sub>2</sub>Cl<sub>2</sub>) δ = 58.4 (ν<sub>2</sub> = 1727 Hz). <sup>13</sup>C{<sup>1</sup>H} NMR (101MHz, CD<sub>2</sub>Cl<sub>2</sub>) δ = 144.1, 142.2, 141.3, 139.3, 137.8, 137.5, 137.1, 136.9, 134.7, 133.2, 132.6, 132.0, 131.3, 131.3, 131.0, 129.2, 128.9, 128.3, 127.5, 127.1, 126.9, 126.9, 126.6, 125.8, 120.4, 95.7, 80.1, 35.6, 23.7, 22.5, 21.6. HRMS (APCI) Calculated for C<sub>39</sub>H<sub>32</sub>B<sup>+</sup> ([M+H]<sup>+</sup>) 511.2592. Found 511.2584.

Note present in **2** is a ca. 5% impurity derived from the bromination at the meta mesityl C-H position

#### Synthesis of **4**

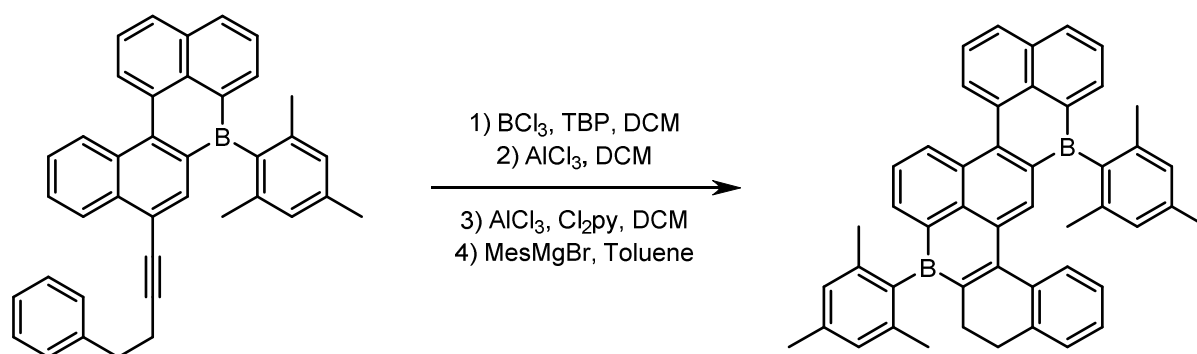

A Schlenk was charged with **2** (0.155 g, 0.303 mmol) and tri-*tert*-butylpyridine (78.8 mg, 0.318 mmol) and then dry DCM was added (4 mL) and BCl<sub>3</sub> (0.45 mL, 1.0 M in DCM, 0.45 mmol) to give a yellow solution. This was stirred at ambient temperature for 1 hour then all volatiles were removed *in vacuo*. To the residue was added AlCl<sub>3</sub> (43 mg, 0.32 mmol) and DCM (4 mL) to give a green solution which changes to yellow then orange within 5 minutes. The mixture was stirred at ambient temperature for 20 minutes then all volatiles were removed *in vacuo*. To the residue was added AlCl<sub>3</sub> (43 mg, 0.32 mmol), 2,6-dichloropyridine (48 mg, 0.32 mmol) and DCM (4 mL) to give a dark orange suspension. The mixture was stirred at ambient temperature for 1 hour then all volatiles were removed *in vacuo*. The residue was taken up in toluene (3 mL) and MesMgBr (3.0 mL, 1.0 M in THF, 3.0 mmol) was added dropwise to give an orange suspension. The mixture was stirred at ambient temperature for 18 hours then all volatiles were removed *in vacuo*. The product was purified by flash column chromatography using a DCM:petrol eluent (7:93 to 15:85) to yield analytically pure product **4** (at R<sub>f</sub> = 0.21 in 15:85 DCM:petrol) as an orange solid (0.144 g, 0.225 mmol, 74% with respect to **2**).

<sup>1</sup>H NMR (400MHz, CD<sub>2</sub>Cl<sub>2</sub>) δ = 8.94 (dd, 8.4 Hz, 1.4 Hz, 1H), 8.49 (s, 1H), 8.46 (dd, 7.5 Hz, 1.1 Hz, 1H), 8.41 (dd, 8.0 Hz, 1.4 Hz, 1H), 8.22 (dd, 8.2 Hz, 1.1 Hz, 1H), 8.19 (ddd, 6.9 Hz, 2.5 Hz, 1.4 Hz, 2H), 7.90 (dd, 7.8 Hz, 7.5 Hz, 1H), 7.83 (dd, 8.4 Hz, 6.8 Hz, 1H), 7.78 (dd, 8.1 Hz, 6.8 Hz, 1H), 7.53 (dd, 7.7 Hz, 1.4 Hz, 1H), 7.33 (dd, 7.5 Hz, 1.7 Hz, 1H), 7.29 (td, 7.3 Hz, 1.4 Hz, 1H), 7.23 (dd, 7.4 Hz, 1.8 Hz, 1H), 6.93 (s, 2H), 6.91 (s, 2H), 2.74 (dd, 7.6 Hz, 6.9 Hz, 2H), 2.47 (dd, 7.6 Hz, 6.8 Hz, 2H), 2.37 (s, 3H), 2.33 (s, 3H), 2.06 (s, 6H), 2.04 (s, 6H). <sup>11</sup>B NMR (128MHz, CD<sub>2</sub>Cl<sub>2</sub>) δ = 59.4 (ν<sub>2</sub> = 2367 Hz). <sup>13</sup>C{<sup>1</sup>H} NMR

(101MHz, CD<sub>2</sub>Cl<sub>2</sub>)  $\delta$  = 152.3, 147.5, 142.8, 142.5, 142.5, 140.4, 139.3, 138.9, 138.9, 137.7, 137.6, 137.0, 136.0, 134.9, 133.3, 132.6, 132.6, 131.8, 131.5, 130.2, 129.7, 128.6, 127.9, 127.5, 127.4, 127.1, 126.3, 126.3, 126.0, 29.6, 28.3, 23.7, 23.3, 21.5. Two carbon resonances cannot be observed due to overlap. HRMS (APCI) Calculated for C<sub>48</sub>H<sub>41</sub>B<sub>2</sub><sup>+</sup> ([M+H]<sup>+</sup>) 639.3389. Found 639.3371.

### Synthesis of 5

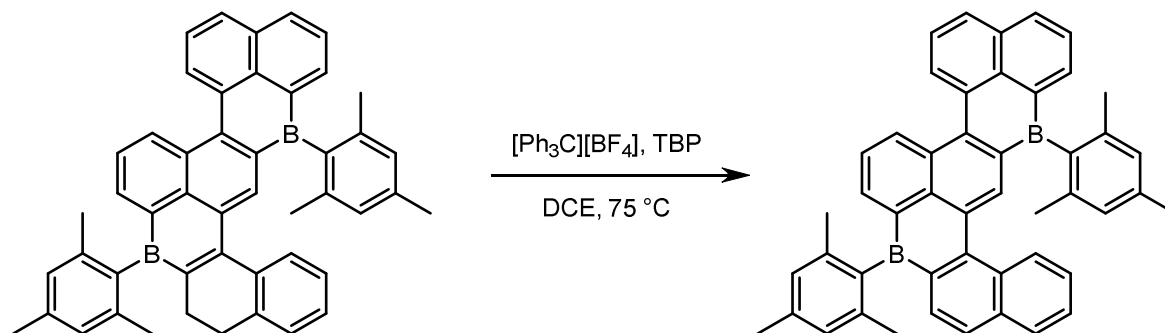

A Schlenk was charged with **4** (0.208 g, 0.326 mmol), tri-*tert*-butylpyridine (0.159 g, 0.643 mmol) and trityl tetrafluoroborate (0.215 g, 0.651 mmol) and dry 1,2-dichloroethane (15 mL) was added to give a bright orange solution which was refluxed at 75 °C for 24 hours. All volatiles were removed *in vacuo* and the product was purified by flash column chromatography using a petrol then 18:82 DCM:Petrol eluent to yield analytically pure product **5** (at R<sub>f</sub> = 0.46 in 18:82 DCM:petrol) as an orange solid (0.201 g, 0.316 mmol, 97% with respect to **4**).

<sup>1</sup>H NMR (400MHz, CD<sub>2</sub>Cl<sub>2</sub>)  $\delta$  = 9.04 (dd, 8.4 Hz, 1.4 Hz, 1H), 8.71 (s, 1H), 8.61 (d, 8.7 Hz, 1H), 8.54 (dd, 7.4 Hz, 1.2 Hz, 1H), 8.43 (dd, 8.1 Hz, 1.5 Hz, 1H), 8.30 – 8.22 (m, 3H), 7.92 (m, 2H), 7.86 (dd, 8.4 Hz, 6.8 Hz, 1H), 7.81 (dd, 8.1 Hz, 6.7 Hz, 1H), 7.77 (d, 1.4 Hz, 2H), 7.60 (ddd, 8.1 Hz, 6.8 Hz, 1.2 Hz, 1H), 7.49 (8.4 Hz, 6.8 Hz, 1.4 Hz, 1H), 6.98 (s, 2H), 6.92 (s, 2H), 2.41 (s, 3H), 2.32 (s, 3H), 2.11 (s, 6H), 2.00 (s, 6H). <sup>11</sup>B NMR (128MHz, CD<sub>2</sub>Cl<sub>2</sub>)  $\delta$  = 61.2 ( $\nu_{1/2}$  = 1691 Hz). <sup>13</sup>C{<sup>1</sup>H} NMR (101MHz, CD<sub>2</sub>Cl<sub>2</sub>)  $\delta$  = 146.9, 144.8, 142.6, 142.5, 140.8, 139.4, 139.4, 139.2, 138.2, 137.6, 137.4, 137.1, 137.1, 137.0, 133.3, 133.1, 132.6, 132.5, 131.7, 131.3, 130.7, 130.4, 130.3, 128.7, 127.9, 127.5, 127.5, 127.2, 127.1, 126.4, 126.3, 125.9, 23.7, 23.7, 21.6, 21.5. HRMS (APCI) Calculated for C<sub>48</sub>H<sub>39</sub>B<sub>2</sub><sup>+</sup> ([M+H]<sup>+</sup>) 637.3232. Found 637.3221.

### Synthesis of 6

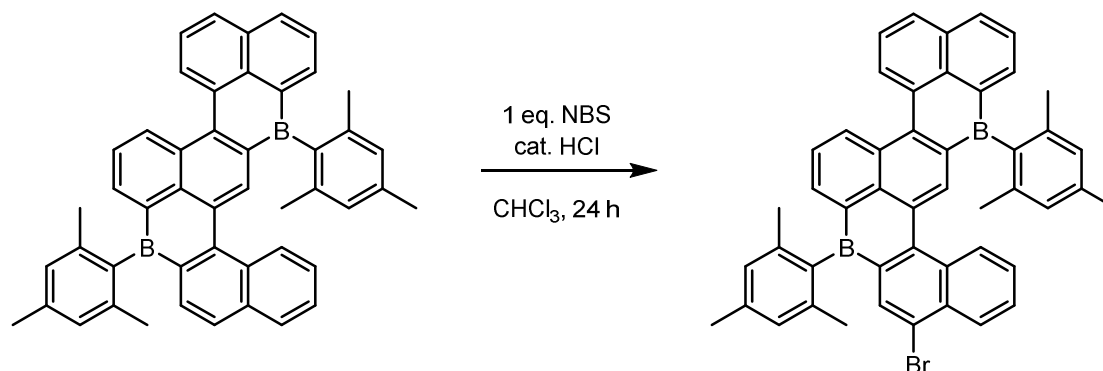

In a 100 mL round-bottomed flask **5** (90 mg, 0.14 mmol) and N-bromosuccinimide (26 mg, 0.15 mmol) were dissolved in wet chloroform (25 mL) and catalytic HCl (30  $\mu$ L, 1.0 M in diethyl ether, 0.03

mmol) was added. The mixture was stirred at ambient temperature for 18 hours then volatiles were removed *in vacuo*. The product was extracted in hexane and filtered through glass wool to give an orange solution. The product was purified by flash column chromatography using a DCM:petrol eluent (7:93 to 20:80) to yield product **6** (at  $R_f = 0.68$  in 20:80 DCM:petrol) as an orange solid (70 mg, 0.098 mmol, 70% with respect to **5**).

A minor amount ca. 5% of bromination at the mesityl meta C-H position is again observed.

$^1\text{H}$  NMR (400MHz,  $\text{CD}_2\text{Cl}_2$ )  $\delta = 9.06$  (dd, 8.3 Hz, 1.5 Hz, 1H), 8.65 (s, 1H), 8.62 (d, 8.7 Hz, 1H), 8.54 (dd, 7.7 Hz, 1.2 Hz, 1H), 8.44 (dd, 8.1 Hz, 1.5 Hz, 1H), 8.39 (dd, 8.7 Hz, 1.2 Hz, 1H), 8.31 (dd, 6.9 Hz, 1.4 Hz, 1H), 8.26 (m, 2H), 8.04 (s, 1H), 7.94 (dd, 8.2 Hz, 7.8 Hz, 1H), 7.89 (dd, 8.4 Hz, 6.9 Hz, 1H), 7.82 (dd, 8.0 Hz, 6.7 Hz, 1H), 7.74 (ddd, 8.3 Hz, 6.7 Hz, 1.2 Hz, 1H), 7.57 (ddd, 8.4 Hz, 6.8 Hz, 1.4 Hz, 1H), 7.01 (s, 2H), 6.93 (s, 2H), 2.44 (s, 3H), 2.32 (s, 3H), 2.11 (s, 6H), 2.02 (s, 6H).  $^{11}\text{B}$  NMR (128MHz,  $\text{CD}_2\text{Cl}_2$ )  $\delta = 57.8$  ( $\nu_{1/2} = 2982$  Hz).  $^{13}\text{C}\{^1\text{H}\}$  NMR (101MHz,  $\text{CD}_2\text{Cl}_2$ )  $\delta = 147.4, 144.8, 142.9, 142.7, 141.5, 139.8, 139.4, 139.2, 137.7, 137.6, 137.2, 137.1, 137.0, 136.5, 136.1, 133.4, 132.9, 132.5, 132.4, 131.9, 131.4, 130.3, 129.8, 129.3, 127.7, 127.6, 127.5, 127.2, 126.6, 126.6, 126.3, 122.4, 23.8, 23.7, 21.6, 21.5$ . HRMS (APCI) Calculated for  $\text{C}_{48}\text{H}_{38}\text{B}_2\text{Br}^+$  ( $[\text{M}+\text{H}]^+$ ) 715.2338. Found 715.2370.

### Synthesis of **7**

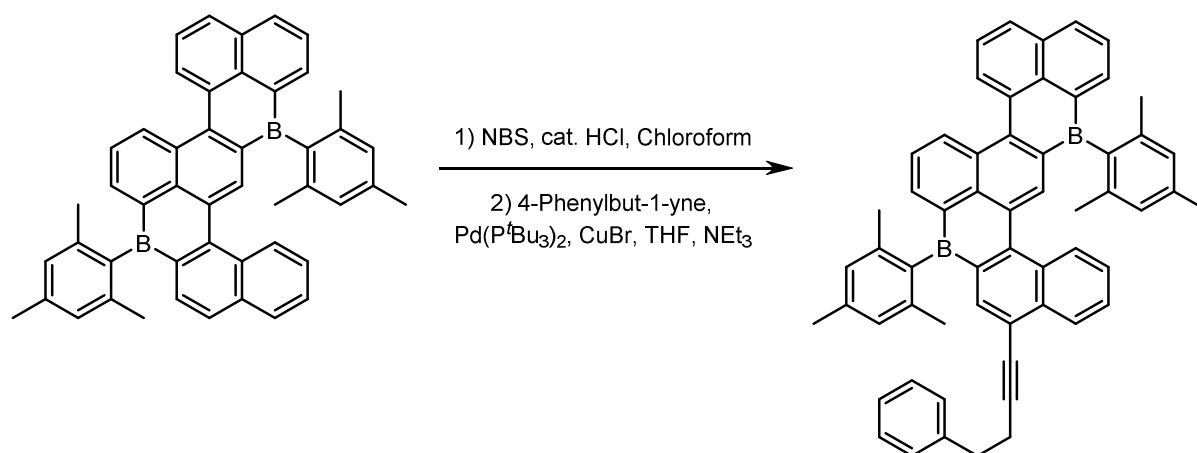

In a 100 mL round-bottomed flask **5** (0.200 g,  $3.15 \times 10^{-4}$  mol) and N-bromosuccinimide (77.0 mg,  $4.33 \times 10^{-4}$  mol) were dissolved in wet chloroform (15 mL) and catalytic HCl (30  $\mu\text{L}$ , 1.0 M in diethyl ether, 0.03 mmol) was added. The orange solution was stirred at ambient temperature for 18 hours. Volatiles were removed *in vacuo* and the residue was taken up in hexane and filtered. NMR spectroscopy confirmed full conversion of **5** to **6**. In a Schlenk crude **6** was taken up in THF (10 mL) and triethylamine (3 mL). To the solution was added CuBr (4 mg,  $3 \times 10^{-5}$  mol) and bis(*tri-tert*-butylphosphine)palladium(0) (6 mg,  $1 \times 10^{-5}$  mol) to give an orange solution. Under argon flow was added 4-phenylbut-1-yne (0.25 mL, 1.8 mmol) to form a dark red solution. The mixture was heated to 60  $^\circ\text{C}$  for 48 hours after which TLC revealed full consumption of **6**. The product was purified by flash column chromatography using a DCM:petrol eluent (12:88 to 20:80) to yield analytically pure product **7** (at  $R_f = 0.34$  in 20:80 DCM:petrol) as a red solid (70.4 mg,  $9.21 \times 10^{-5}$  mol, 29% with respect to **5**).

$^1\text{H}$  NMR (400MHz,  $\text{CD}_2\text{Cl}_2$ )  $\delta = 9.03$  (dd, 8.4, 1.3 Hz, 1H), 8.66 (s, 1H), 8.59 (d, 8.6 Hz, 1H), 8.52 (d, 7.4 Hz, 1H), 8.42 (dd, 8.1, 1.3 Hz, 1H), 8.31 – 8.21 (m, 4H), 7.91 (dd, 7.8, 7.4 Hz, 1H), 7.87 (s, 1H), 7.86 (dd, 8.4, 6.7 Hz, 1H), 7.80 (dd, 8.0, 6.8 Hz, 1H), 7.62 (ddd, 8.1, 6.7, 1.1 Hz, 1H), 7.51 (ddd, 8.4, 6.7, 1.3 Hz, 1H), 7.36 – 7.19 (m, 5H), 7.02 (s, 2H), 6.93 (s, 2H), 2.99 (t, 7.2 Hz, 2H), 2.85 (t, 7.2 Hz, 2H), 2.45 (s, 3H), 2.33 (s, 3H), 2.11 (s, 6H), 2.01 (s, 6H).  $^{11}\text{B}$  NMR (128MHz,  $\text{CD}_2\text{Cl}_2$ )  $\delta = 62.1$  ( $\nu_{1/2} = 3006$  Hz).  $^{13}\text{C}\{^1\text{H}\}$

NMR (101MHz, CD<sub>2</sub>Cl<sub>2</sub>)  $\delta$  = 147.1, 144.6, 142.6, 141.3, 141.3, 140.6, 139.7, 139.6, 139.4, 139.2, 137.6, 137.6, 137.5, 137.2, 137.1, 137.1, 135.3, 135.0, 134.8, 134.4, 133.3, 132.5, 132.4, 131.8, 131.1, 131.0, 130.3, 130.0, 129.3, 128.9, 128.4, 127.5, 127.5, 127.2, 127.0, 126.8, 126.5, 126.3, 126.2, 120.4, 95.7, 80.2, 35.6, 23.7, 23.6, 22.6, 21.6, 21.6. HRMS (APCI) Calculated for C<sub>58</sub>H<sub>46</sub>B<sub>2</sub>K<sup>+</sup> ([M+K]<sup>+</sup>) 803.3417. Found 803.3387.

### Synthesis of **8**

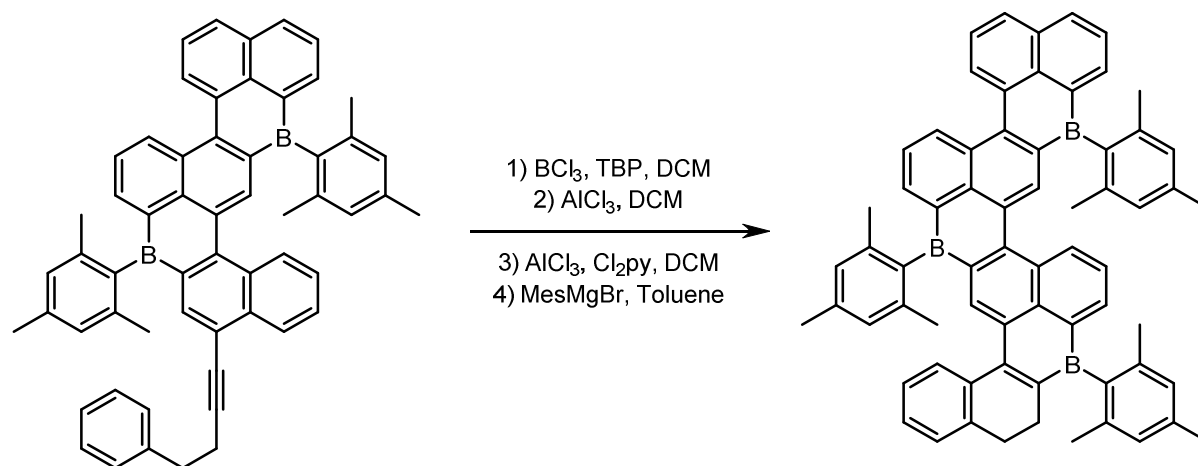

A Schlenk was charged with **7** (52.9 mg, 6.92 x 10<sup>-5</sup> mol) and tri-*tert*-butylpyridine (18 mg, 7.3 x 10<sup>-5</sup> mol) and dry DCM (2 mL) and BCl<sub>3</sub> (0.12 mL, 1.0 M in DCM, 0.12 mmol) were added to give an orange/red solution. This was stirred at ambient temperature for 40 min. then all volatiles were removed *in vacuo*. To the residue was added AlCl<sub>3</sub> (10 mg, 7.5 x 10<sup>-5</sup> mol) and DCM (2 mL) and the mixture was stirred at ambient temperature for 30 minutes. All volatiles were removed *in vacuo* and to the residue was added AlCl<sub>3</sub> (10 mg, 7.5 x 10<sup>-5</sup> mol), 2,6-dichloropyridine (17 mg, 0.11 mmol) and DCM (2 mL) to give a dark red suspension. The mixture was stirred at ambient temperature for 1 hour then all volatiles were removed *in vacuo*. The residue was taken up in toluene (2.5 mL) and MesMgBr (0.5 mL, 1.0 M in THF, 0.5 mmol) was added dropwise to give a pink/red suspension. The mixture was stirred at ambient temperature for 18 hours then all volatiles were removed *in vacuo*. The product was purified by preparative thin layer chromatography using a DCM:petrol eluent (20:80) to yield analytically pure product **8** at R<sub>f</sub> = 0.38 as a red solid (42.3 mg, 4.73 x 10<sup>-5</sup> mol, 68% with respect to **7**).

<sup>1</sup>H NMR (400MHz, CD<sub>2</sub>Cl<sub>2</sub>)  $\delta$  = 9.07 (dd, 8.4, 1.3 Hz, 1H), 8.86 (dd, 8.4, 1.4 Hz, 1H), 8.58 – 8.54 (m, 2H), 8.52 (s, 1H), 8.44 (dd, 8.6, 1.4 Hz, 1H), 8.33 (dd, 6.9, 1.3 Hz, 1H), 8.30 – 8.23 (m, 2H), 8.16 (dd, 6.8, 1.3 Hz, 1H), 7.97 – 7.82 (m, 2H), 7.82 (dd, 8.1, 6.8 Hz, 1H), 7.71 (dd, 8.3, 6.8 Hz, 1H), 7.52 (dd, 7.6, 1.3 Hz, 1H), 7.37 – 7.28 (m, 2H), 7.24 (ddd, 7.4, 7.3, 1.9 Hz, 1H), 6.96 (s, 2H), 6.93 (s, 2H), 6.91 (s, 2H), 2.74 (t, 7.1 Hz, 2H), 2.50 – 2.44 (m, 2H), 2.38 (s, 3H), 2.36 (s, 3H), 2.28 (s, 3H), 2.13 (s, 6H), 2.12 (s, 6H), 2.03 (s, 6H). <sup>11</sup>B NMR (128MHz, CD<sub>2</sub>Cl<sub>2</sub>)  $\delta$  = 60.0 ( $\nu_{1/2}$  = 3184 Hz). <sup>13</sup>C{<sup>1</sup>H} NMR (101MHz, CD<sub>2</sub>Cl<sub>2</sub>)  $\delta$  = 152.3, 147.9, 147.8, 145.2, 144.4, 142.9, 142.8, 142.8, 142.4, 141.8, 140.5, 140.2, 139.6, 139.3, 139.1, 138.9, 138.7, 137.7, 137.5, 137.4, 137.2, 136.9, 135.7, 135.3, 135.1, 134.9, 134.4, 133.3, 132.5, 132.4, 132.0, 131.5, 130.4, 130.3, 130.0, 129.6, 128.5, 127.9, 127.5, 127.5, 127.3, 127.2, 126.7, 126.3, 125.9, 125.9, 29.6, 28.2, 23.7, 23.7, 23.3, 21.6, 21.5, 21.5. HRMS (APCI) Calculated for C<sub>67</sub>H<sub>56</sub>B<sub>3</sub><sup>+</sup> ([M+H]<sup>+</sup>) 893.4656. Found 893.4645.

## Synthesis of 9

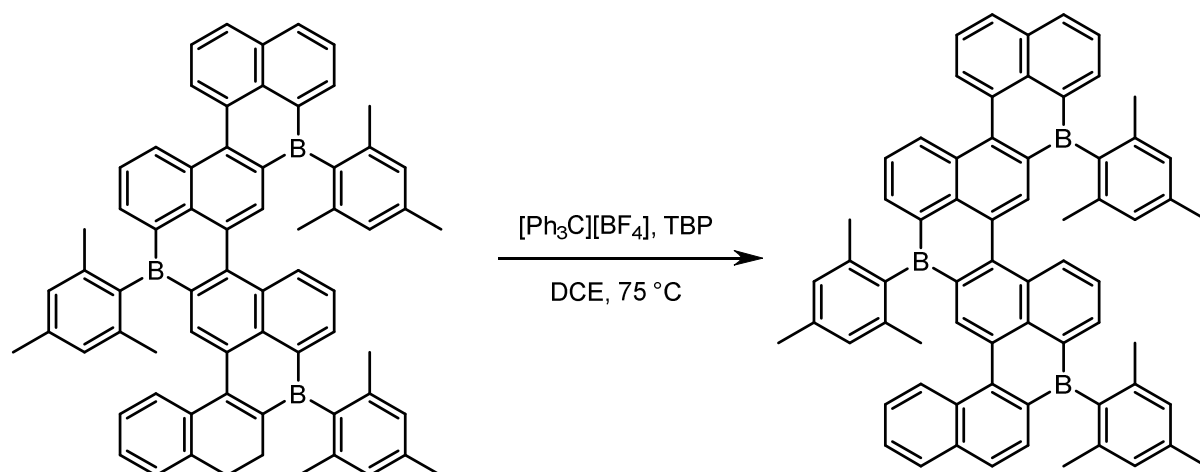

A Schlenk was charged with **8** (24.2 mg,  $2.71 \times 10^{-5}$  mol), tri-*tert*-butylpyridine (15 mg,  $6.1 \times 10^{-5}$  mol) and trityl tetrafluoroborate (19 mg,  $5.8 \times 10^{-5}$  mol) and dry 1,2-dichloroethane (0.5 mL) was added to give a dark red suspension which was refluxed at 75 °C for 72 hours. Once cool all volatiles were removed *in vacuo* and the product was purified by preparative thin layer chromatography using a DCM:petrol eluent (20:80) to yield product **9** at  $R_f = 0.35$  as a red solid (13.6 mg,  $1.52 \times 10^{-5}$  mol, 56% with respect to **8**).

$^1\text{H}$  NMR (400MHz,  $\text{CD}_2\text{Cl}_2$ )  $\delta = 9.11$  (dd, 8.4, 1.4 Hz, 1H), 8.96 (dd, 8.4, 1.4 Hz, 1H), 8.77 (s, 1H), 8.61 (s, 1H), 8.60 – 8.57 (m, 2H), 8.45 (dd, 8.1, 1.5 Hz, 1H), 8.39 (dd, 6.9, 1.3 Hz, 1H), 8.30 – 8.22 (m, 3H), 7.99 – 7.90 (m, 3H), 7.82 (dd, 8.1, 6.8 Hz, 1H), 7.78 – 7.71 (m, 3H), 7.60 (ddd, 8.0, 6.7, 1.1 Hz, 1H), 7.49 (ddd, 8.3, 6.8, 1.4 Hz, 1H), 6.98 (s, 2H), 6.97 (s, 2H), 6.91 (s, 2H), 2.42 (s, 3H), 2.35 (s, 3H), 2.27 (s, 3H), 2.16 (s, 6H), 2.14 (s, 6H), 1.99 (s, 6H).  $^{11}\text{B}$  NMR (128MHz,  $\text{CD}_2\text{Cl}_2$ )  $\delta = 62.6$  ( $\nu_{1/2} = 2689$  Hz).  $^{13}\text{C}\{^1\text{H}\}$  NMR (101MHz,  $\text{CD}_2\text{Cl}_2$ )  $\delta = 147.8, 147.3, 144.9, 143.8, 142.9, 142.8, 142.8, 142.6, 141.0, 140.2, 139.9, 139.6, 139.4, 139.3, 139.2, 139.2, 138.2, 137.7, 137.6, 137.4, 137.3, 137.2, 136.8, 136.2, 135.3, 135.0, 134.5, 134.4, 133.4, 133.1, 132.6, 132.5, 132.0, 131.3, 130.8, 130.5, 130.5, 130.4, 130.1, 128.6, 127.9, 127.5, 127.4, 127.2, 127.2, 126.7, 126.4, 126.1, 125.9, 23.7, 23.7, 23.7, 21.6, 21.6, 21.5$ . HRMS (APCI) Calculated for  $\text{C}_{67}\text{H}_{54}\text{B}_3^+$  ( $[\text{M}+\text{H}]^+$ ) 891.4499. Found 891.4508.



## NMR Spectra and Mass Spectra

Crude 9-bromo-7-mesityl-7H-dinaphtho[1,8-bc:1',2'-e]borinine (**1**) without purification of  $\text{Ph}_3\text{CH}$

$^1\text{H}$  ( $\text{CDCl}_3$ )

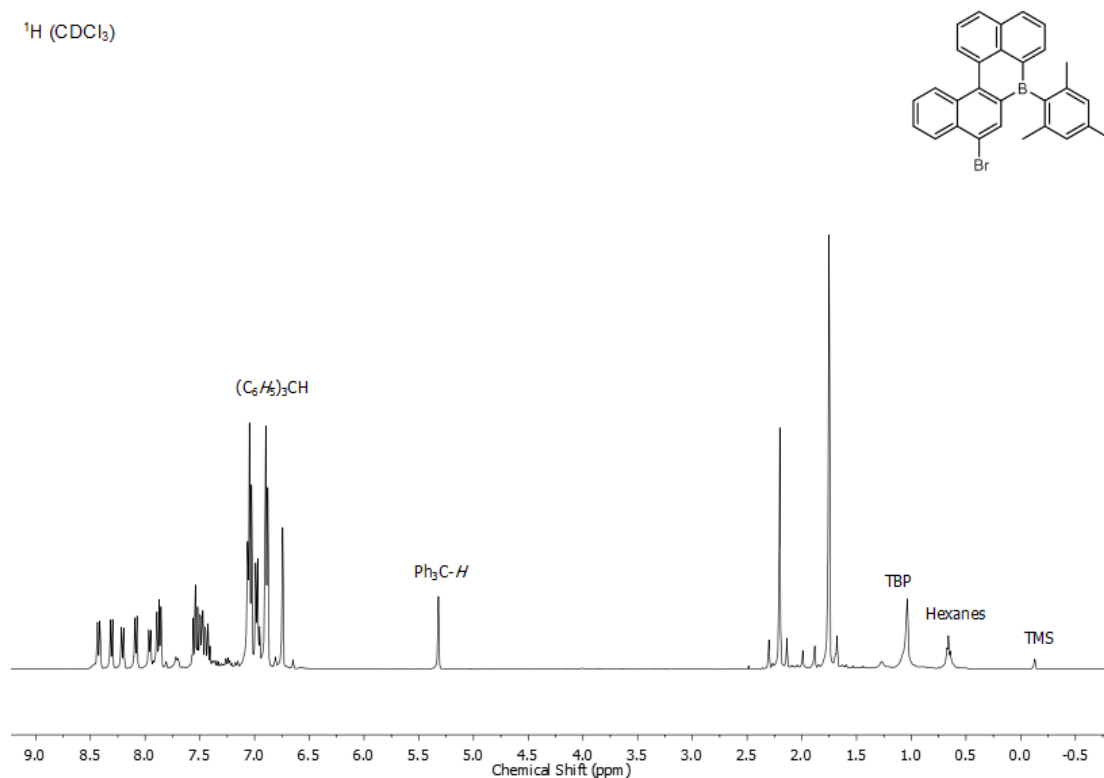

A number of the small resonances between 1.5 and 2.5 ppm are Mes- $\text{CH}_3$  resonances for the minor product from bromination at the meta C-H position of mesityl.

$^{13}\text{C}\{^1\text{H}\}$  ( $\text{CDCl}_3$ )

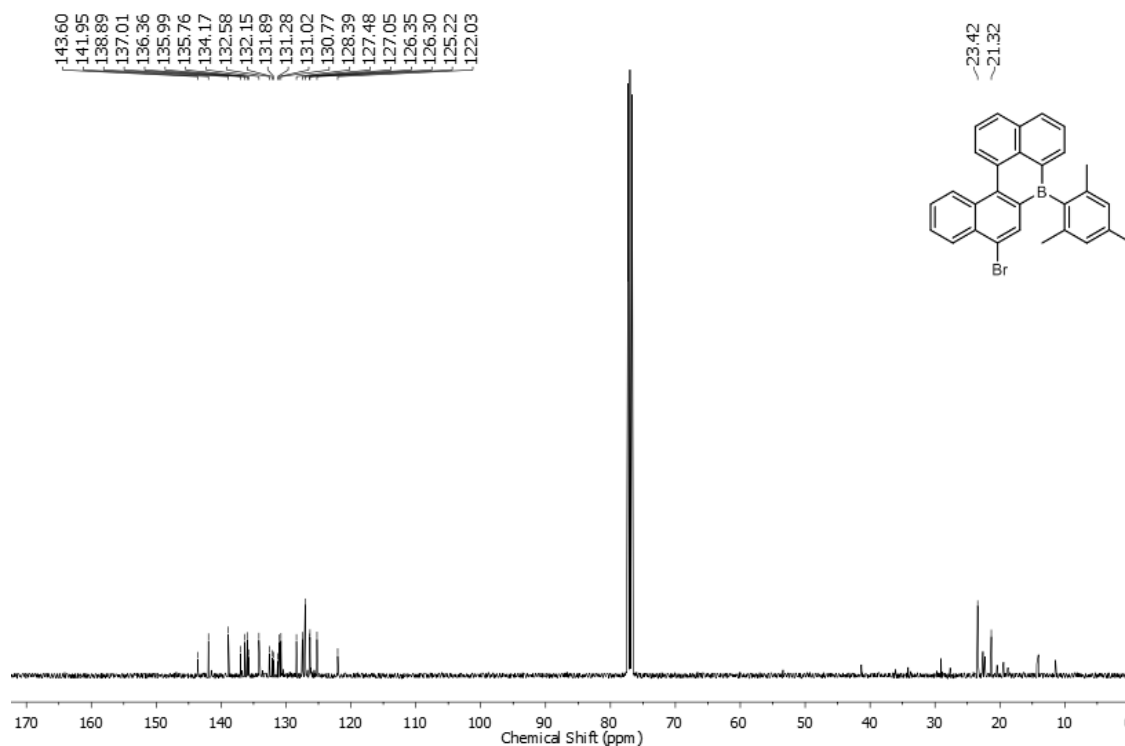

Crude 9-bromo-7-mesityl-7H-dinaphtho[1,8-bc:1',2'-e]borinine (1) (after purification to remove all Ph<sub>3</sub>CH)

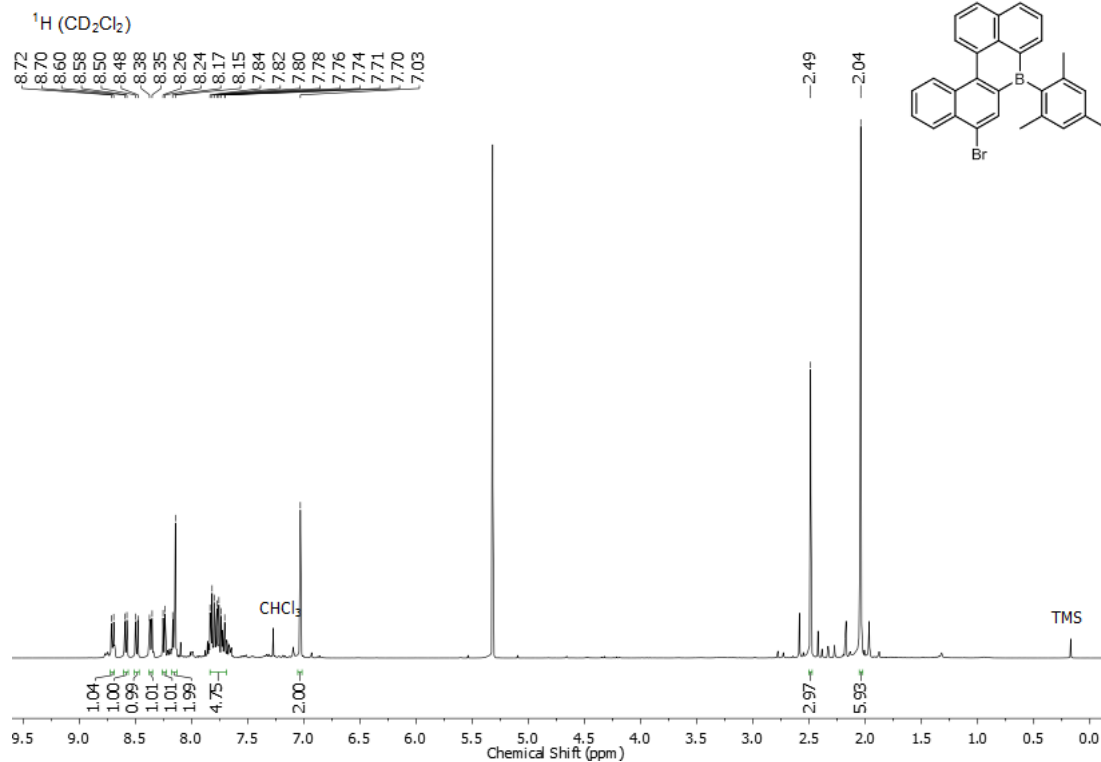

A number of the small resonances between 1.5 and 2.5 ppm are Mes-CH<sub>3</sub> resonances for the minor product from bromination at the meta C-H position of mesityl.

<sup>11</sup>B (CD<sub>2</sub>Cl<sub>2</sub>)

-57.87

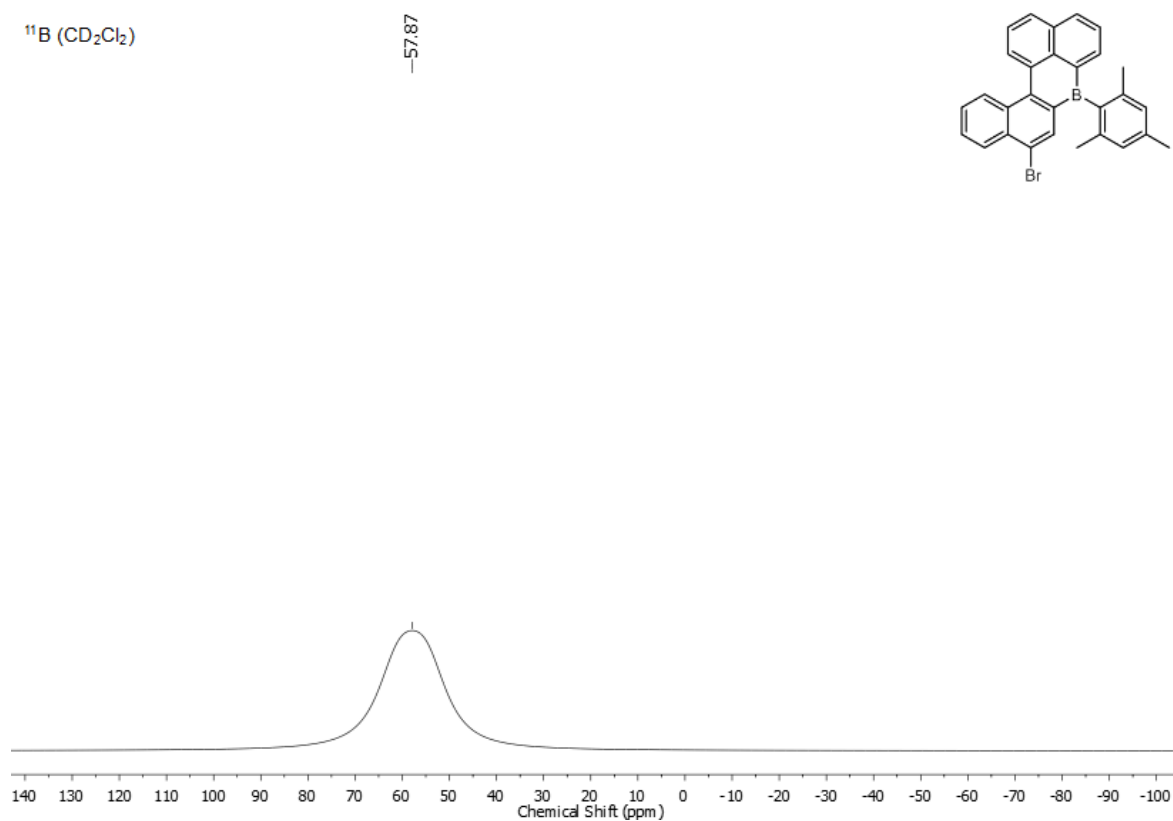

## Compound 2

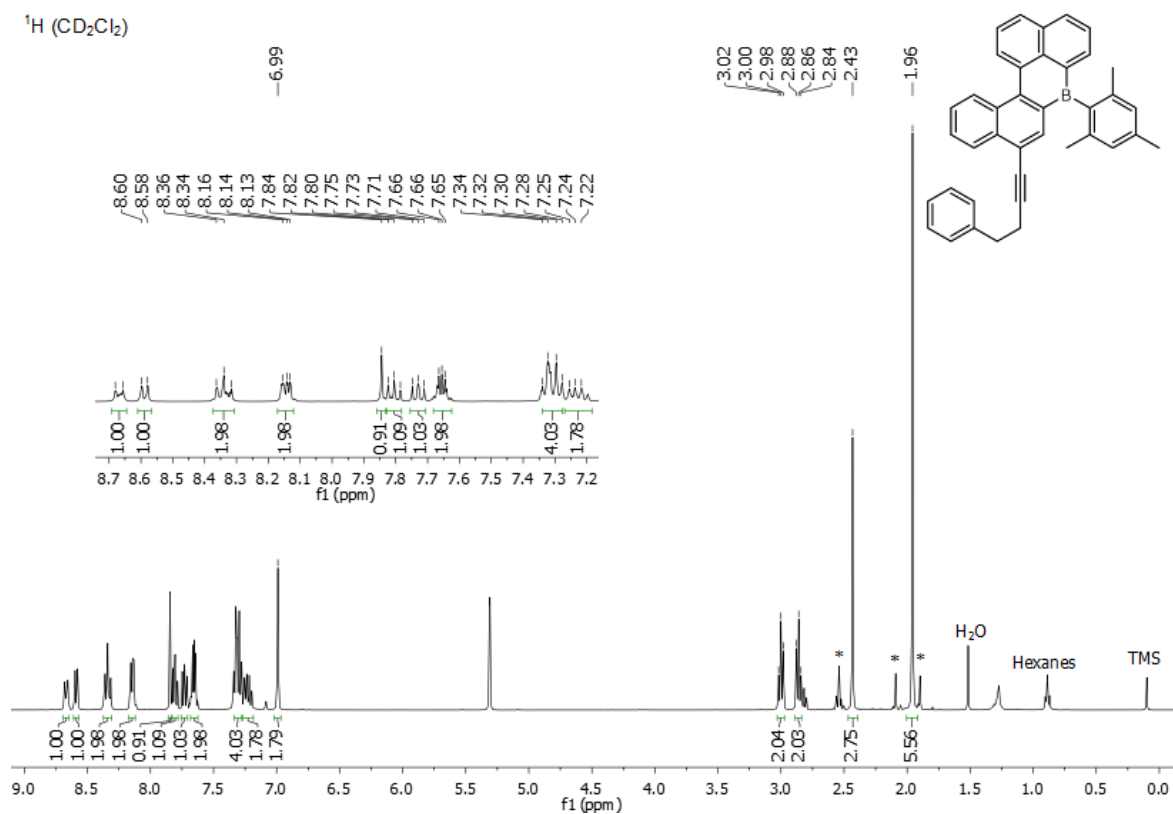

\*Small resonances between 1.5 and 2.5 ppm are Mes-CH<sub>3</sub> resonances for the minor product derived from the double bromination product **2-Br**.

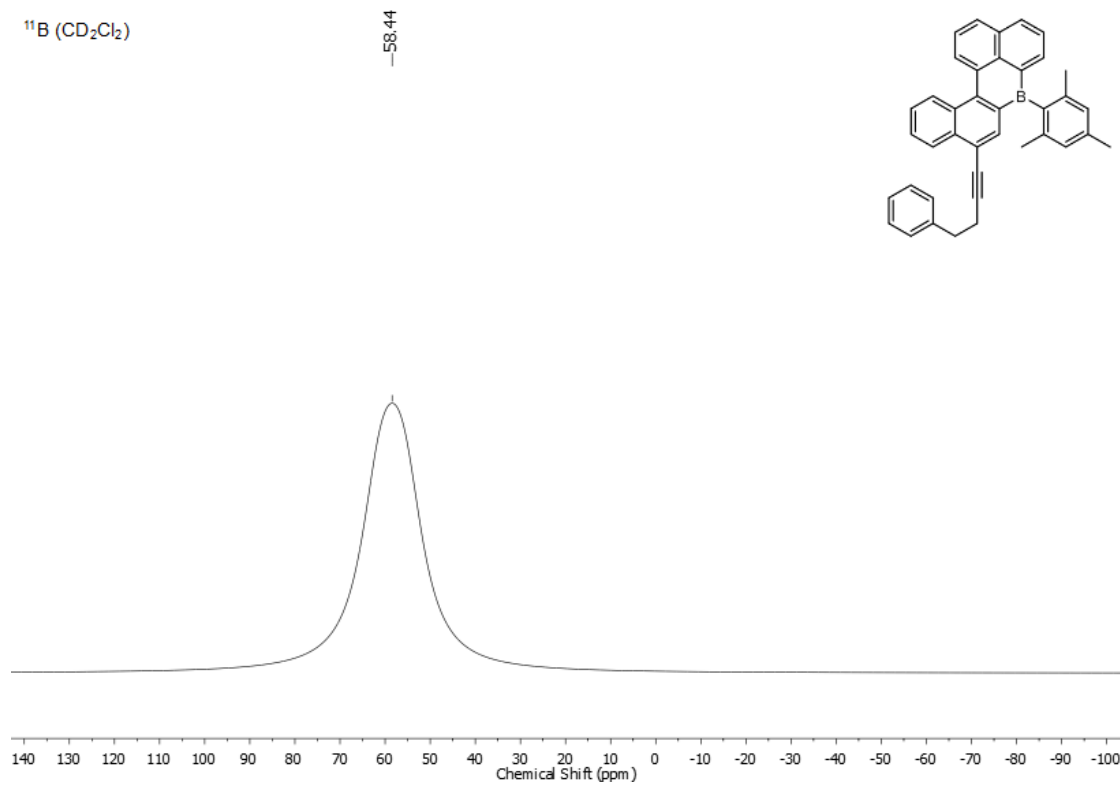



The mass spectra indicate the presence of the desired product plus the brominated analogue. The position of bromination is from the combined NMR spectra (3 minor Mes methyl peaks and from X-ray diffraction studies, see later).

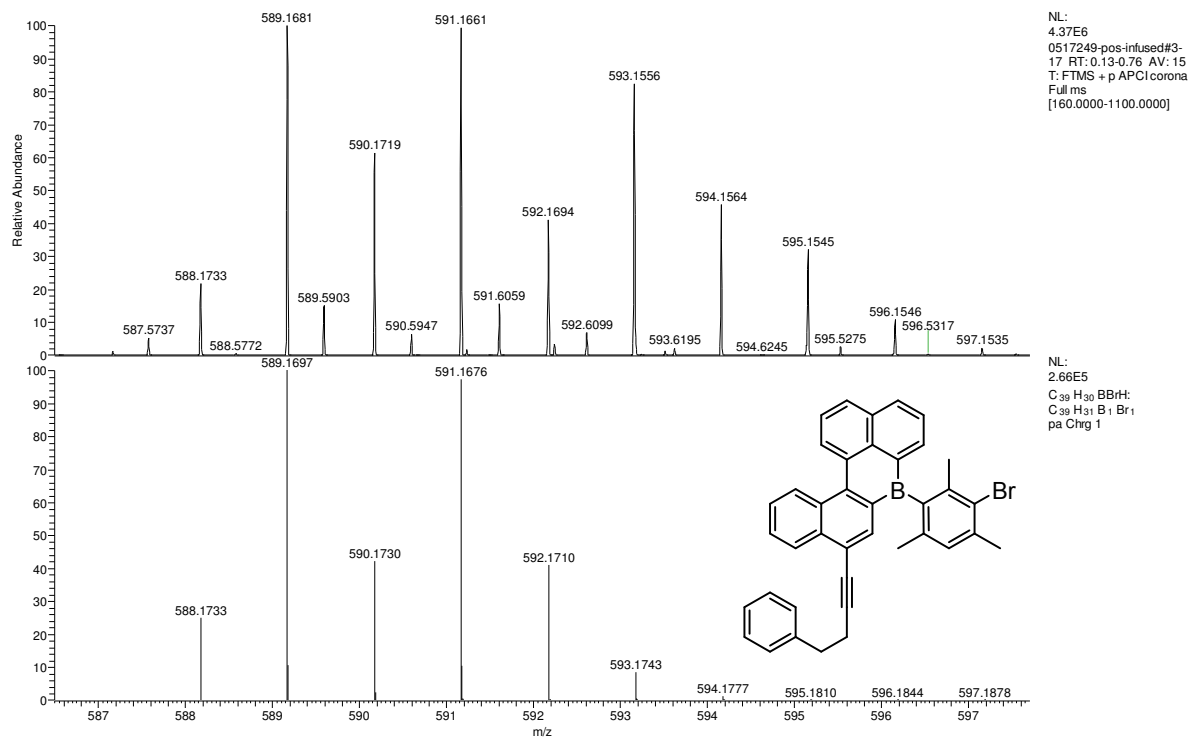

#### Compound 4

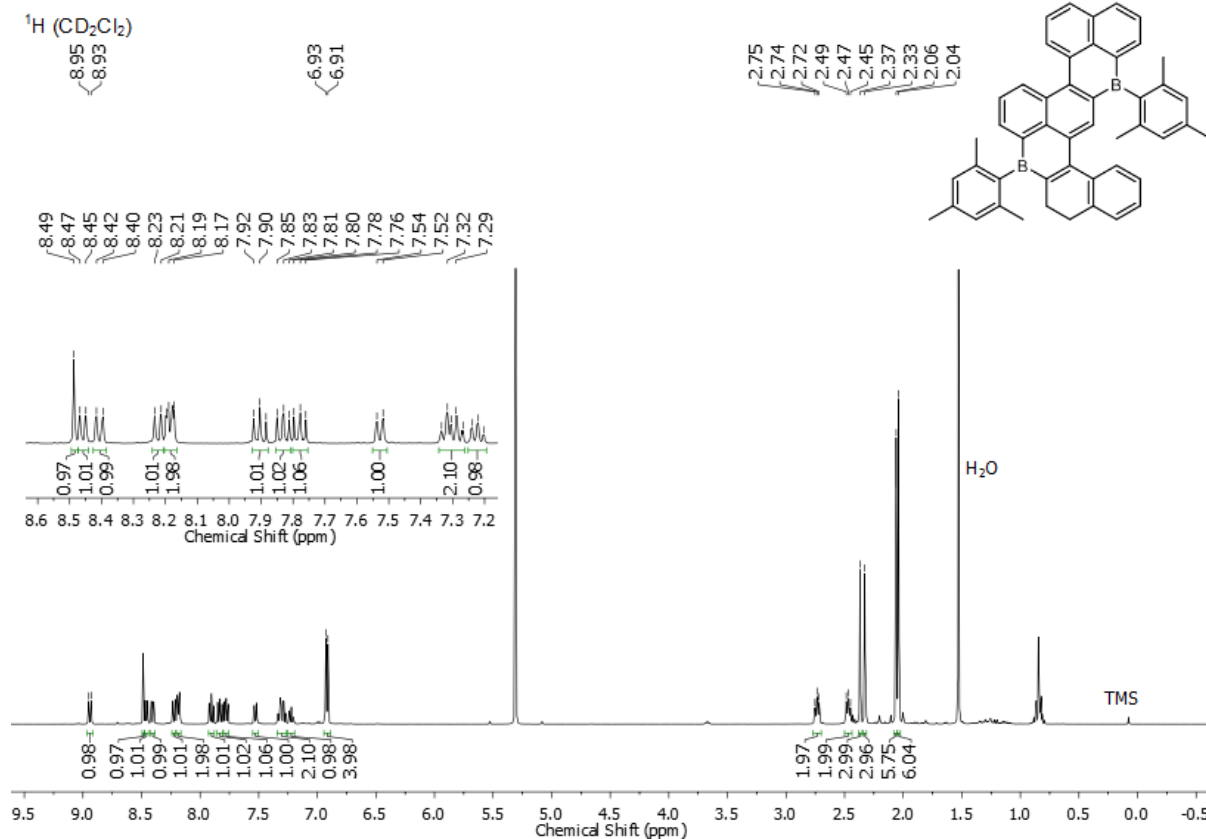

$^{11}\text{B}$  ( $\text{CD}_2\text{Cl}_2$ )

-59.43

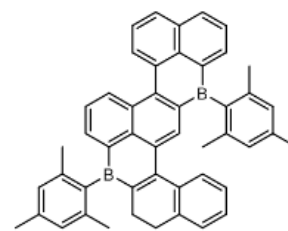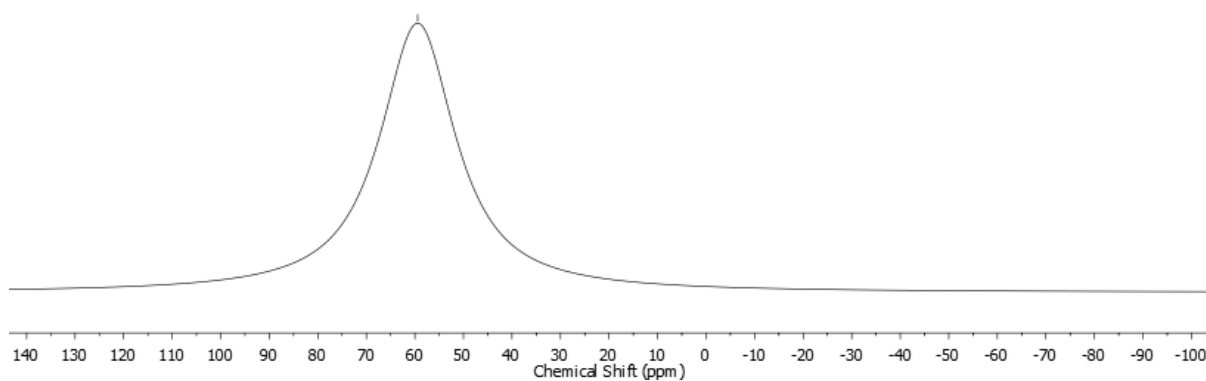

$^{13}\text{C}\{^1\text{H}\}$  ( $\text{CD}_2\text{Cl}_2$ )

-152.30  
-147.47

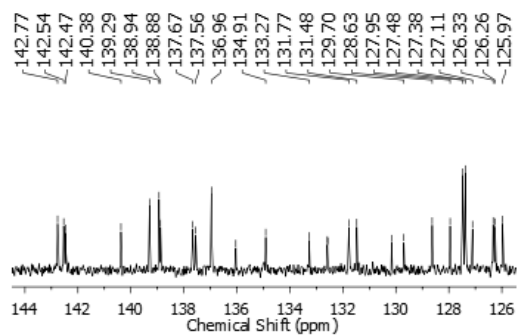

29.63  
28.26  
23.66  
23.31  
21.54

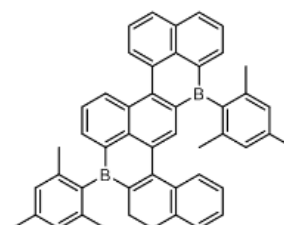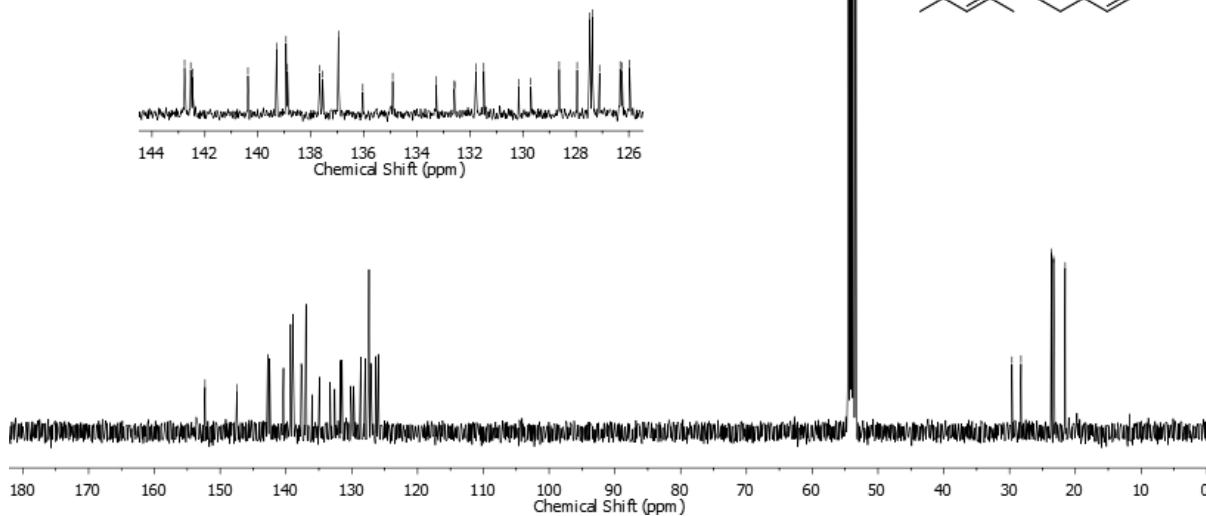

## Compound 5

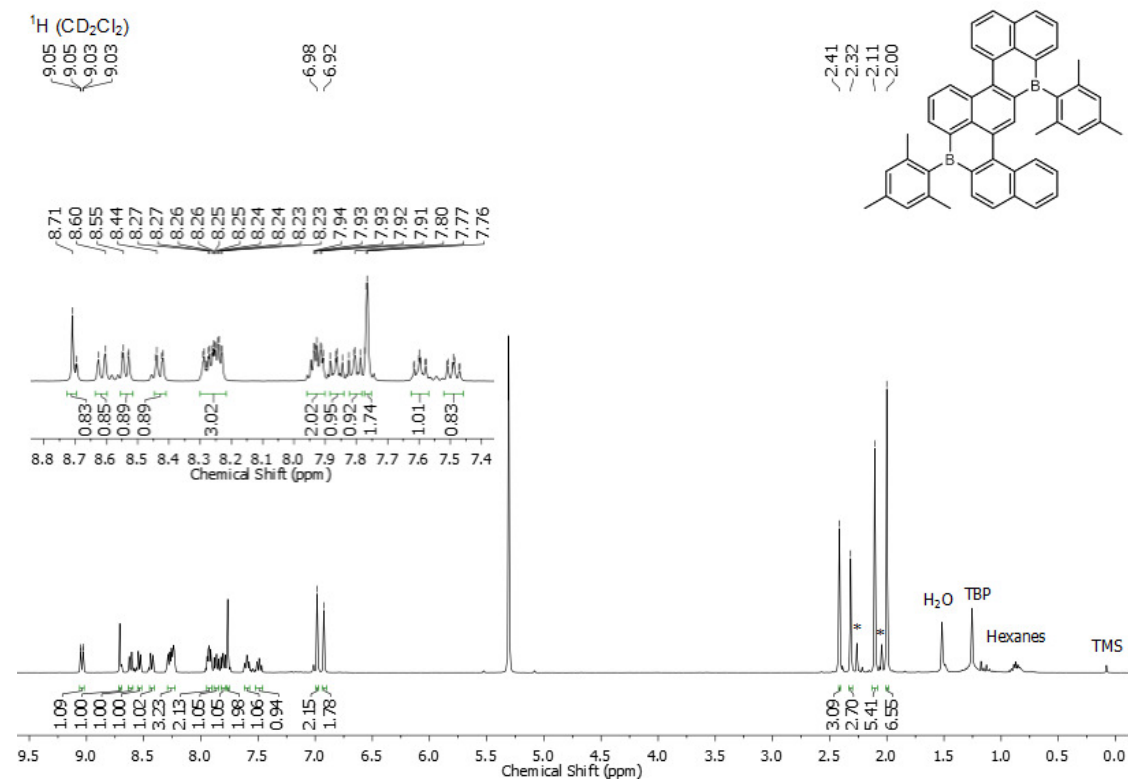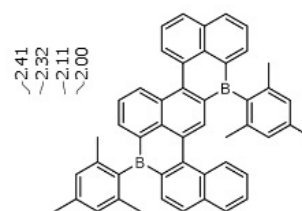

\*Small resonances between 1.5 and 2.5 ppm are Mes-CH<sub>3</sub> resonances for the minor brominated product.

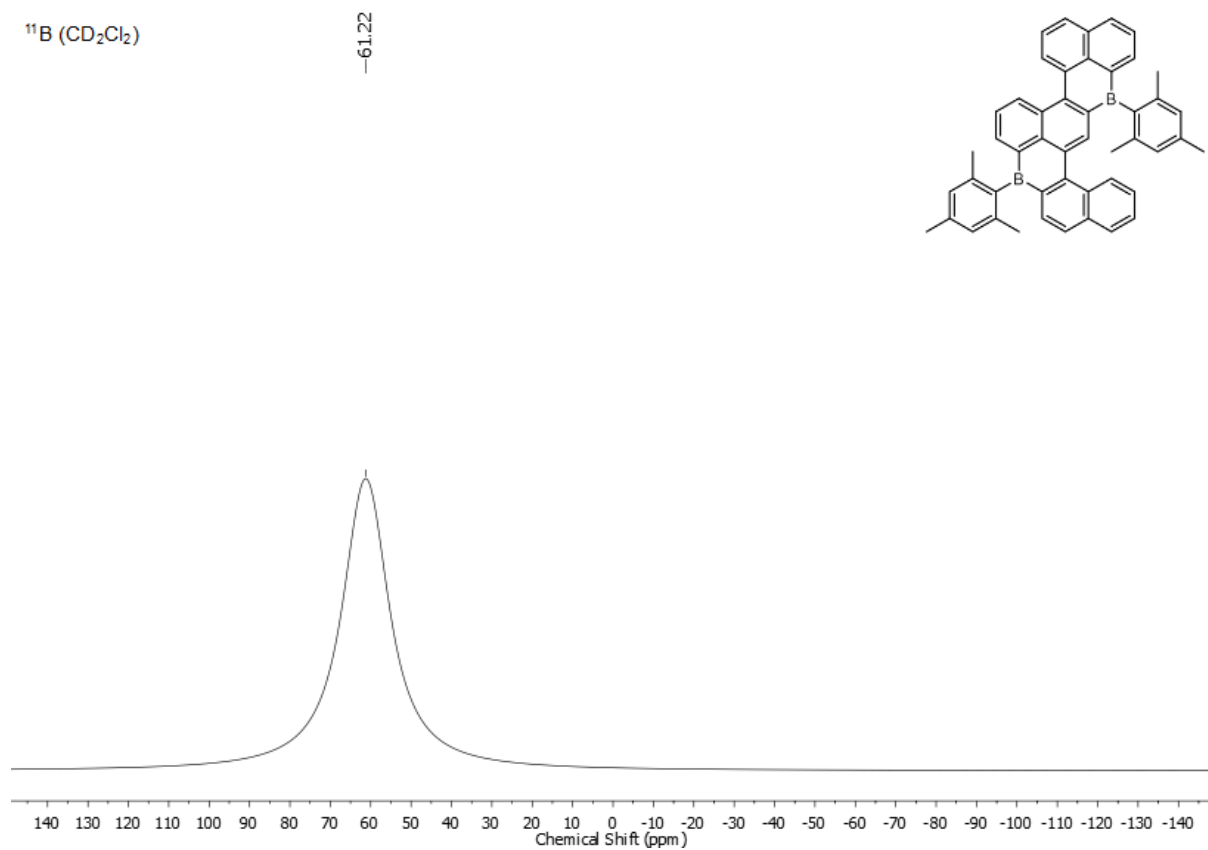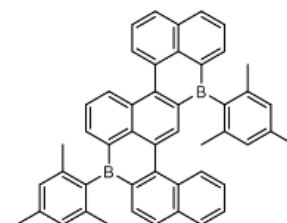





$^{11}\text{B}$  ( $\text{CD}_2\text{Cl}_2$ )

-57.79

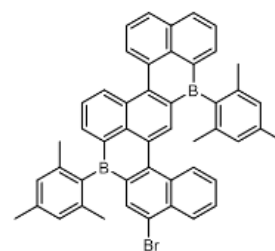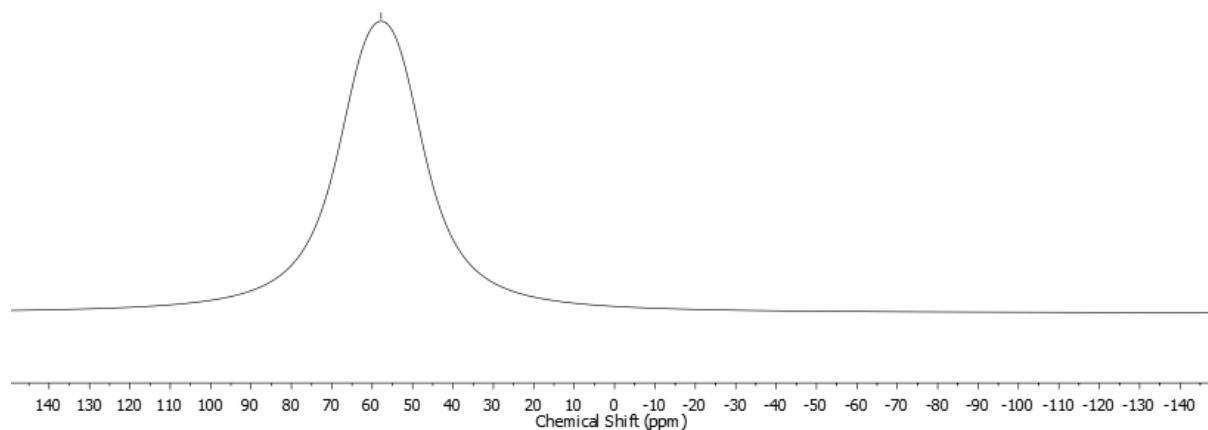

$^{13}\text{C}\{^1\text{H}\}$  ( $\text{CD}_2\text{Cl}_2$ )

-147.37  
-144.78

-122.41

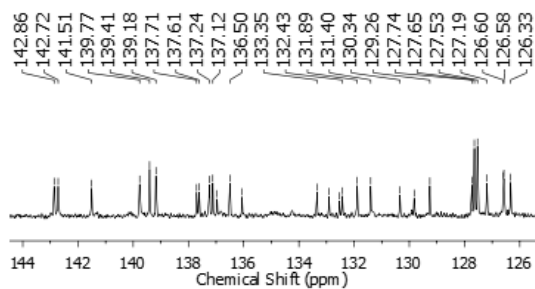

23.75  
23.67  
21.63  
21.53

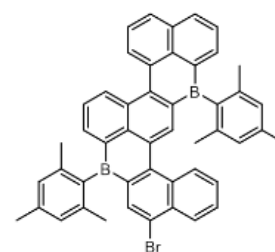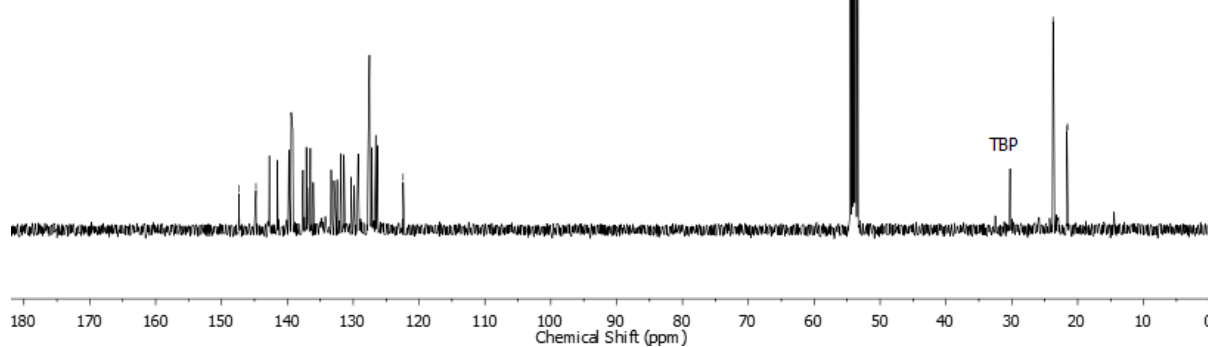

Again minor resonances for a second product containing different Mes methyls are observed in the  $^1\text{H}$  NMR spectrum which are attributed to a mesityl brominated by-product.





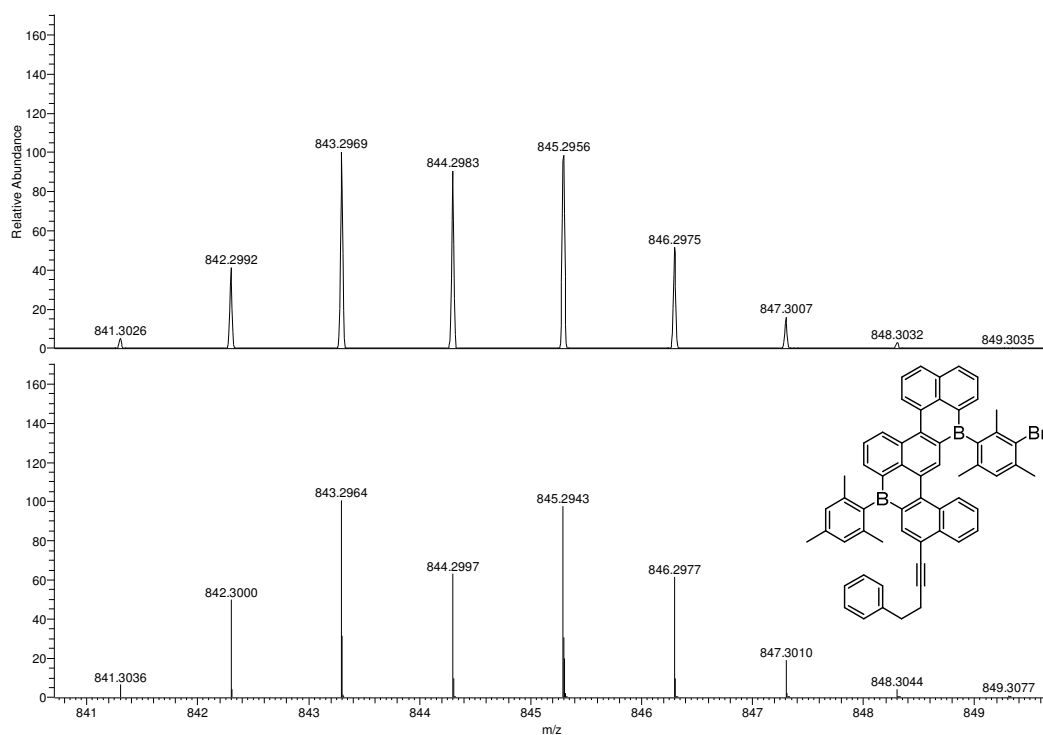

### Compound 8

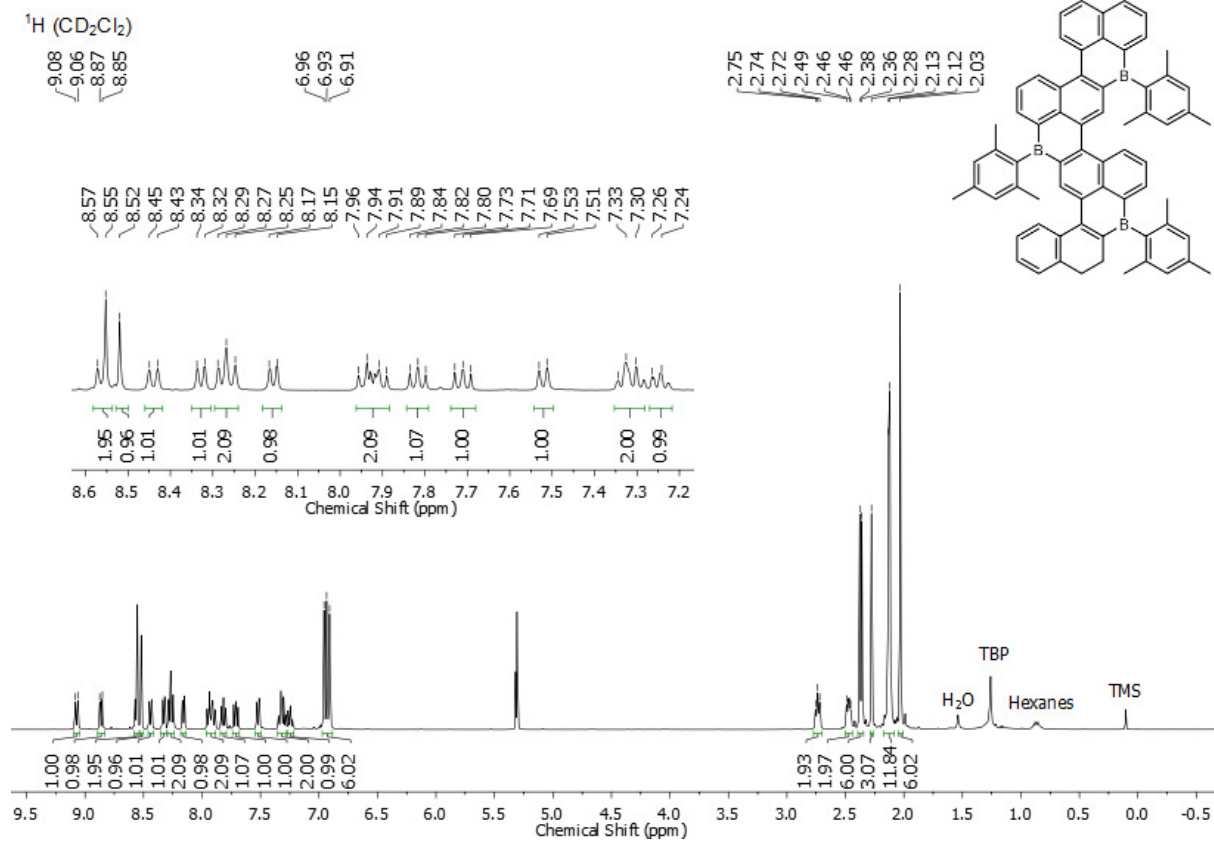

$^{11}\text{B}$  ( $\text{CD}_2\text{Cl}_2$ )

-60.05

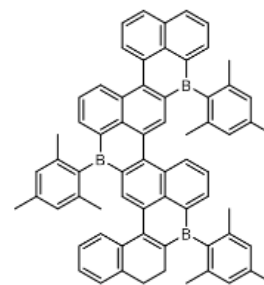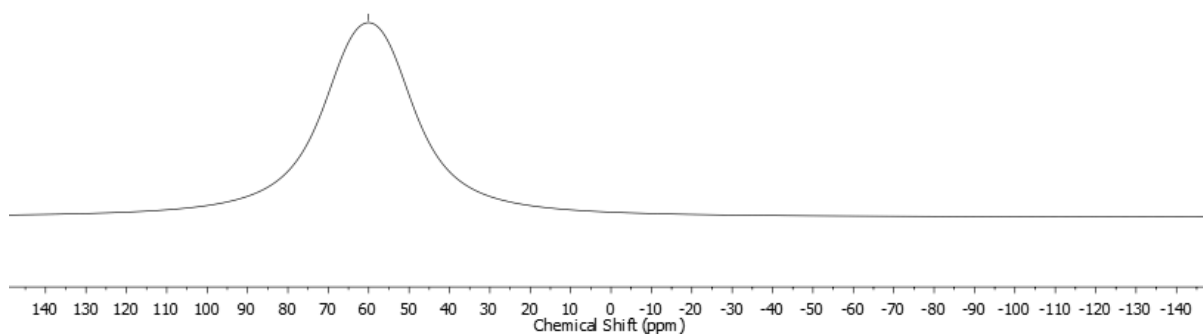

$^{13}\text{C}\{^1\text{H}\}$  ( $\text{CD}_2\text{Cl}_2$ )

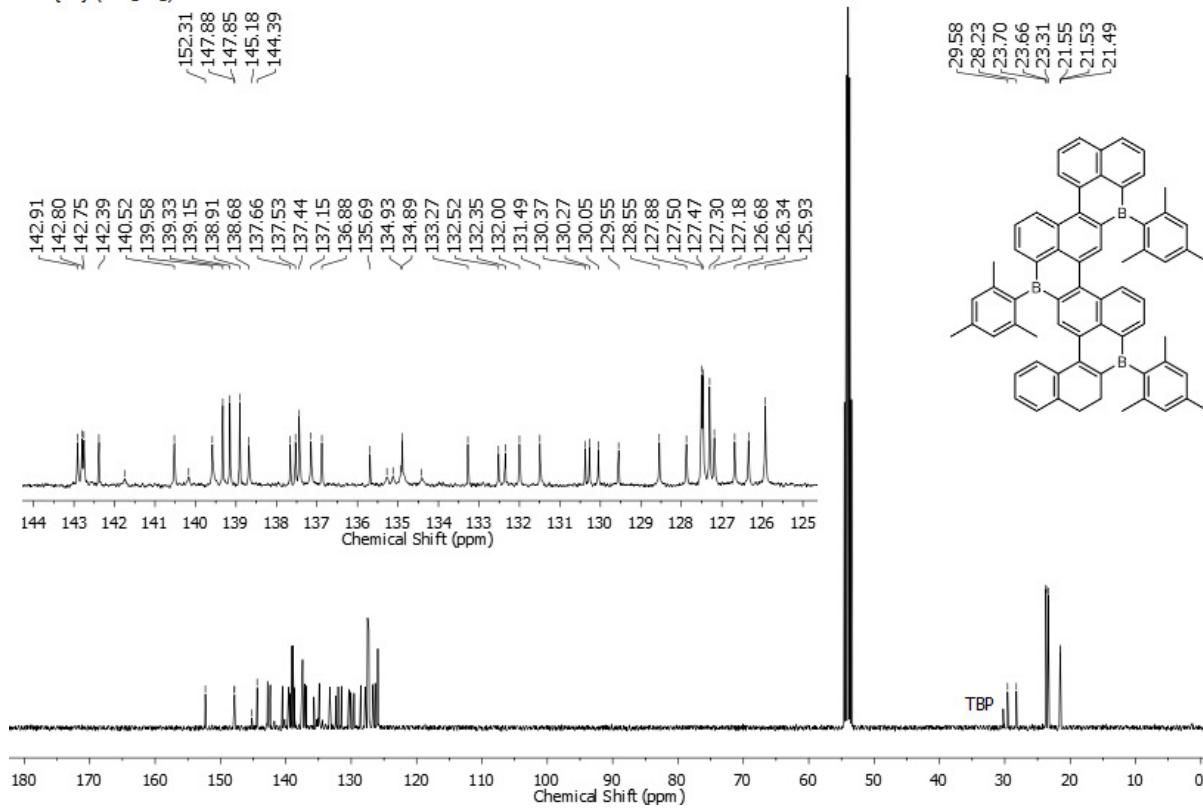

# Compound 9

$^1\text{H}$  ( $\text{CD}_2\text{Cl}_2$ )

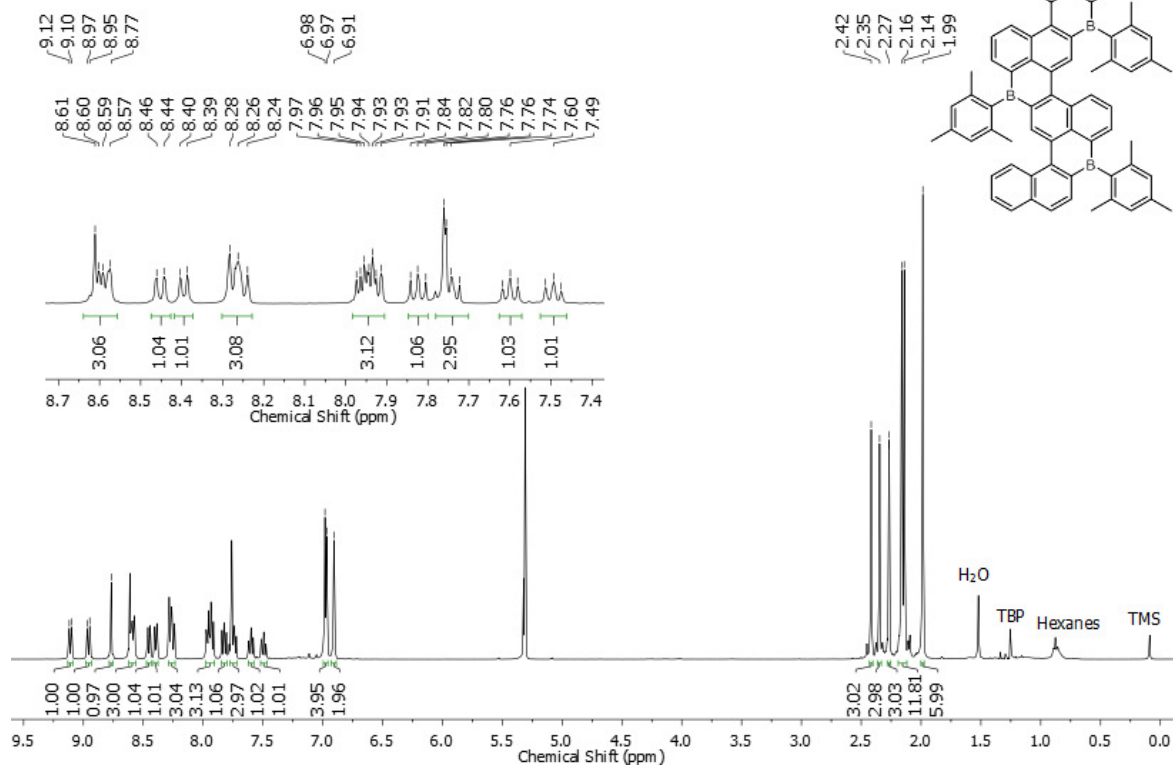

$^{11}\text{B}$  ( $\text{CD}_2\text{Cl}_2$ )

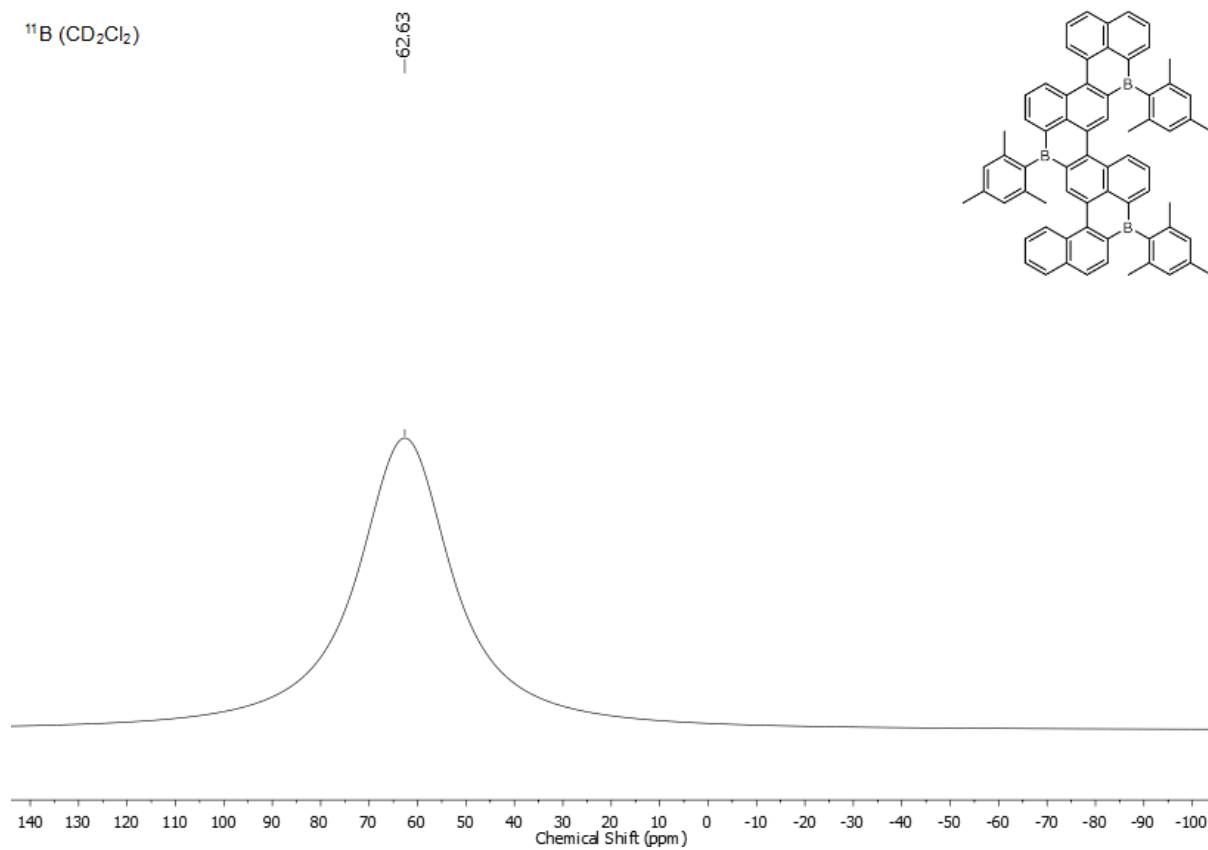



0.0279(10) (Br3). Further flat and sadi restraints were introduced in order to refine sensible geometries around the mesityl C-B bond. The thermal parameters for all disordered components were restrained in order to refine sensible thermal ellipsoids.

The molecular structure of compound **2** also presents disorder on the phenyl ring next to the -CH<sub>2</sub>CH<sub>2</sub>- moiety (thermal parameters for these were restrained using RIGU and SIMU).

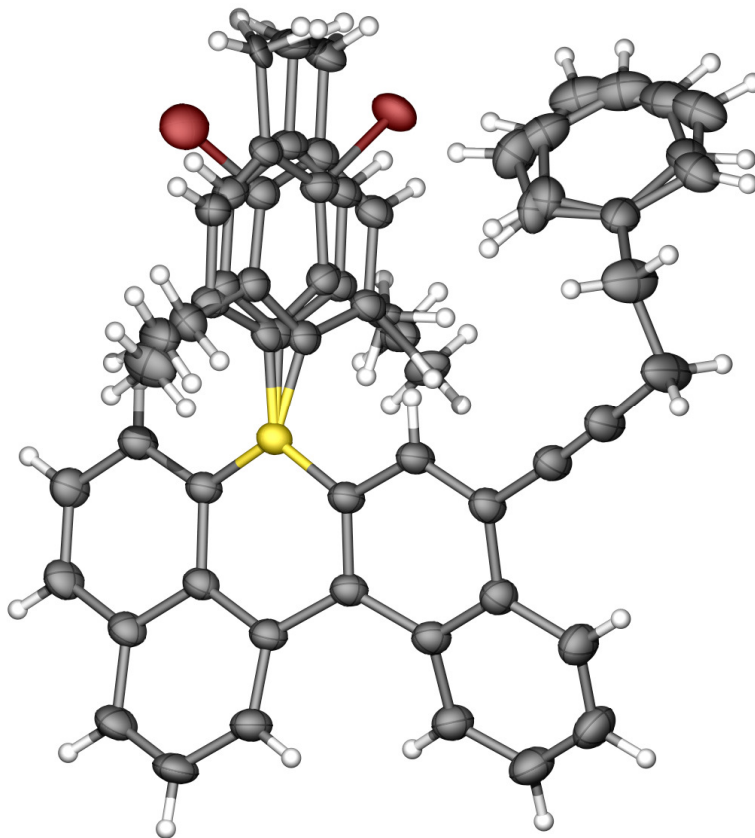

**Figure S1** Representation of the asymmetric unit of **2** in the crystal. (carbon = grey, boron = yellow, bromine = brown and hydrogen = white; image produced using POV-ray).<sup>14</sup>

### Compound 7

The data collected for compound **7** was found to contain significant electron density at the meta-position of two of the mesityl rings. This was assigned as traces of bromine, based on data from mass spectrometry. The bromine occupancies were freely refined to 0.085(3) (Br2) and 0.044(3) (Br1)

Crystals of the sample are very weakly diffracting, therefore the data were truncated accordingly. Despite best efforts, better data could not be obtained using a synchrotron source.



There is a solvent void present in the structure with poorly defined features in the electron density map, which was modelled using a solvent mask calculated using Olex2. The solvent void was calculated to contain 50.4 electrons and so has been assigned as CH<sub>2</sub>Cl<sub>2</sub>.

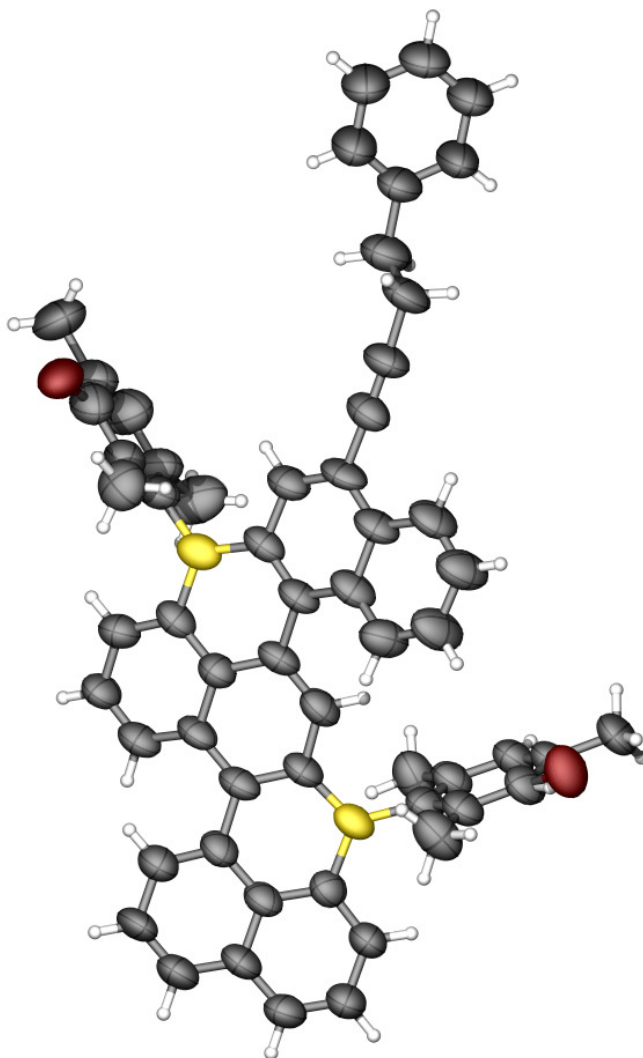

**Figure S2** Representation of the asymmetric unit of 1mji7 in the crystal. (carbon = grey, boron = yellow, bromine = brown and hydrogen = white; image produced using POV-ray<sup>3</sup>)

**Table S1** Crystal Structure Refinement Data

|                                                        | <b>2</b>                                                         | <b>7</b>                                                             |
|--------------------------------------------------------|------------------------------------------------------------------|----------------------------------------------------------------------|
| Empirical Formula                                      | C <sub>39</sub> H <sub>30.89</sub> BBr <sub>0.11</sub>           | C <sub>58</sub> H <sub>45.87</sub> B <sub>2</sub> Br <sub>0.13</sub> |
| Fw/g mol <sup>-1</sup>                                 | 518.93                                                           | 774.82                                                               |
| Temperature/K                                          | 150.00(10)                                                       | 150.0(2)                                                             |
| Crystal system, Space Group                            | Monoclinic, P2 <sub>1</sub> /n                                   | Monoclinic, P2 <sub>1</sub> /c                                       |
| a /Å                                                   | 10.71416(15)                                                     | 17.5450(17)                                                          |
| b /Å                                                   | 18.5823(3)                                                       | 12.6207(12)                                                          |
| c /Å                                                   | 14.07156(18)                                                     | 22.2518(14)                                                          |
| α /°                                                   | 90                                                               | 90                                                                   |
| β /°                                                   | 95.4564(12)                                                      | 94.451(9)                                                            |
| γ /°                                                   | 90                                                               | 90                                                                   |
| Vol /Å <sup>3</sup>                                    | 2788.87(7)                                                       | 4912.4(8)                                                            |
| Z, calc density /g.cm <sup>-3</sup>                    | 4, 1.236                                                         | 4, 1.048                                                             |
| Abs coeff /mm <sup>-1</sup>                            | 0.694                                                            | 0.559                                                                |
| F(000)                                                 | 1095.0                                                           | 1634.0                                                               |
| Crystal, colour                                        | Block, yellow                                                    | Plate, Red                                                           |
| Crystal dimensions /mm <sup>3</sup>                    | 0.347 × 0.164 × 0.133                                            | 0.161 × 0.058 × 0.007                                                |
| Radiation                                              | CuKα (λ = 1.54184)                                               | CuKα (λ = 1.54184)                                                   |
| 2θ range for data collection /deg                      | 7.904 to 154.82                                                  | 5.052 to 108.478                                                     |
| Index ranges                                           | -13 ≤ h ≤ 13, -23 ≤ k ≤ 23,<br>-17 ≤ l ≤ 17                      | -18 ≤ h ≤ 14, -13 ≤ k ≤ 13, -<br>23 ≤ l ≤ 23                         |
| Reflections collected/unique                           | 36142                                                            | 35475                                                                |
| Independent reflections                                | 5791 [R <sub>int</sub> = 0.0567,<br>R <sub>sigma</sub> = 0.0257] | 5986 [R <sub>int</sub> = 0.1607,<br>R <sub>sigma</sub> = 0.1028]     |
| Data/restraint/parameters                              | 5791/1241/593                                                    | 5986/6/561                                                           |
| Goodness-of-fit on F <sup>2</sup>                      | 1.169                                                            | 0.946                                                                |
| Final R indices [F <sup>2</sup> < 2θ(F <sup>2</sup> )] | R <sub>1</sub> = 0.0599, wR <sub>2</sub> = 0.1453                | R <sub>1</sub> = 0.0816, wR <sub>2</sub> = 0.2117                    |
| R indices (all data)                                   | R <sub>1</sub> = 0.0619, wR <sub>2</sub> = 0.1464                | R <sub>1</sub> = 0.1672, wR <sub>2</sub> = 0.2687                    |
| Largest diff peak and hole /e Å <sup>-3</sup>          | 0.23, -0.20                                                      | 0.41, -0.20                                                          |

## Photophysical Properties

Table S2 Summary of photophysical data.

| Compound              | $\lambda_{\text{max,abs}}$ (nm) <sup>a</sup> | $\epsilon \times 10^{-3}$ (M <sup>-1</sup> cm <sup>-1</sup> ) <sup>a</sup> | $\lambda_{\text{max,em}}$ (nm) <sup>a</sup> | Stoke shift (nm) | PLQY (%) <sup>b</sup> | Band-gap (eV) <sup>a</sup> |
|-----------------------|----------------------------------------------|----------------------------------------------------------------------------|---------------------------------------------|------------------|-----------------------|----------------------------|
| <b>G</b> <sup>5</sup> | 351, 367, 420                                | 16.1, 12.9, 4.1                                                            | 516 <sup>d</sup>                            | 94               | 16                    | 2.61                       |
| <b>4</b>              | 378, 404, 427, 474                           | 15.1, 12.8, 10.4, 10.4                                                     | 554                                         | 80               | 30                    | 2.31                       |
| <b>5</b>              | 388, 406 (s), 486                            | 9.6, 8.6, 10.9                                                             | 569                                         | 83               | 49                    | 2.27                       |
| <b>8</b>              | 322, 513                                     | 41.6, 21.8                                                                 | 611                                         | 98               | 34                    | 2.12                       |
| <b>9</b>              | 326, 522                                     | 48.0, 23.8                                                                 | 623                                         | 101              | 34                    | 2.08                       |
| <b>J</b> <sup>5</sup> | 318, 353, 487                                | 46.5, 12.5, 21.5                                                           | 592 <sup>e</sup>                            | 105              | 23                    | 2.31                       |

<sup>a</sup>Measured at  $1 \times 10^{-5}$  M in toluene, <sup>b</sup>absolute quantum yield values measured using an integrating sphere at  $0.2 \times 10^{-5}$  M in toluene (estimated error  $\pm 10\%$ ), <sup>s</sup>Shoulder,  $\lambda_{\text{ex}}$  (nm): <sup>d</sup>351, <sup>e</sup>487

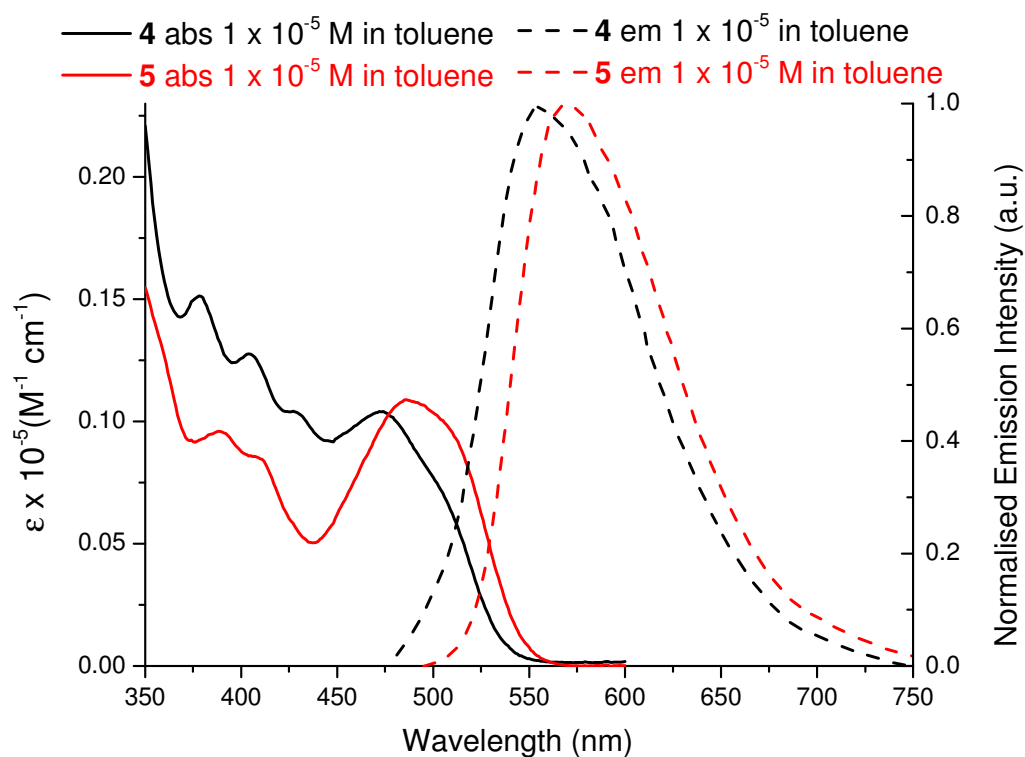

Figure S3 Absorbance and emission spectra of **4** and **5** in toluene ( $1 \times 10^{-5}$  M).

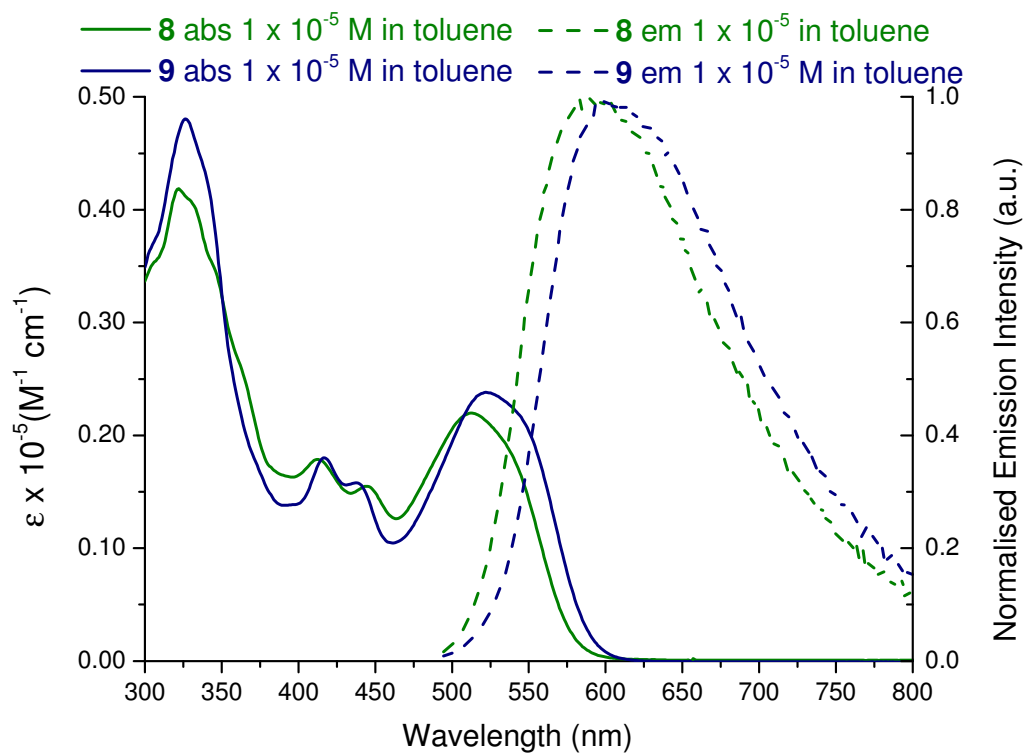

**Figure S4** Absorbance and emission spectra of **8** and **9** in toluene ( $1 \times 10^{-5}$  M).

**Table S3** Summary of photophysical data in varying solvents.

| Compound           | $\lambda_{\text{max}_{\text{abs}}}$<br>(nm) <sup>a</sup> | $\lambda_{\text{max}_{\text{em}}}$<br>(nm) <sup>a</sup> | PLQY<br>(%) <sup>b</sup> |
|--------------------|----------------------------------------------------------|---------------------------------------------------------|--------------------------|
| <b>8 (toluene)</b> | 322, 513                                                 | 611                                                     | 34                       |
| <b>8 (MeCN)</b>    | 319, 509                                                 | 625                                                     | 31                       |
| <b>9 (toluene)</b> | 326, 522                                                 | 623                                                     | 34                       |
| <b>9 (MeCN)</b>    | 323, 519                                                 | 626                                                     | 29                       |

<sup>a</sup>Measured at  $1 \times 10^{-5}$  M, <sup>b</sup>absolute quantum yield values measured using an integrating sphere (estimated error  $\pm 10\%$ )

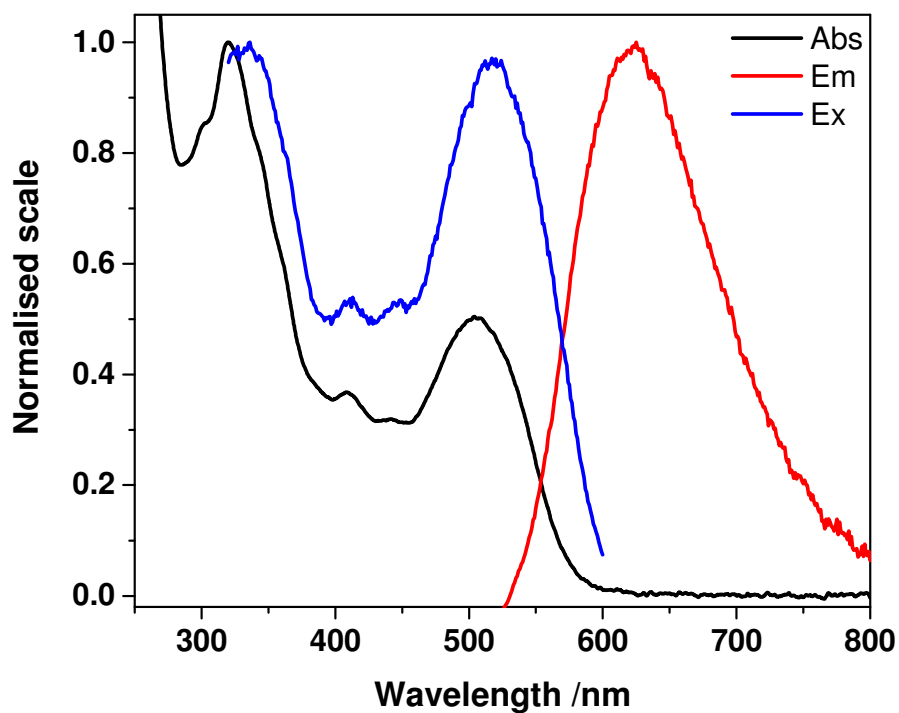

Figure S5 Absorbance, excitation and emission spectra of **8** in MeCN.

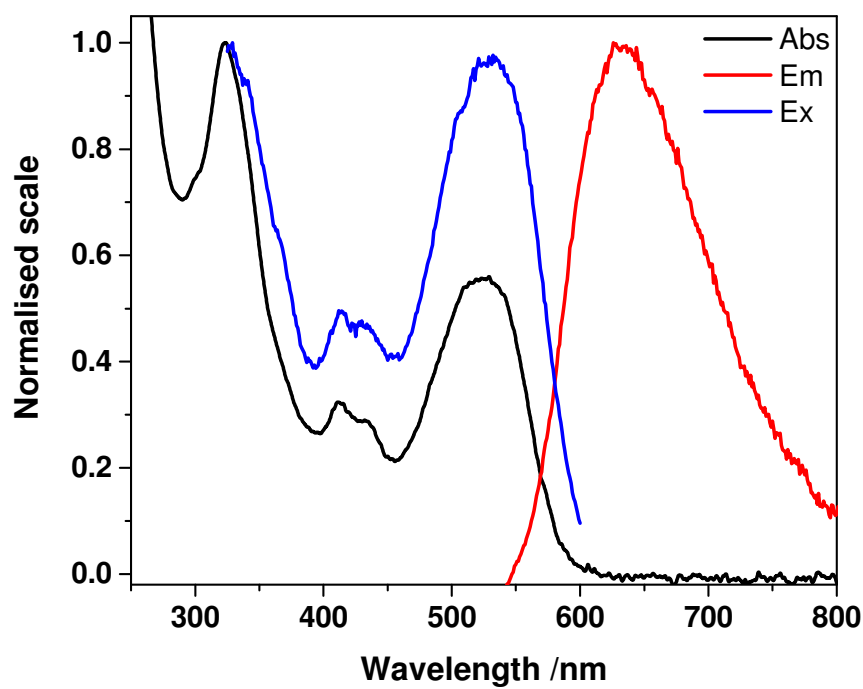

Figure S6 Absorbance, excitation and emission spectra of **9** in MeCN.

## Electrochemical Properties

**Table S4** Summary of cyclic voltammetry results

| Compound              | First Reduction |               |                 |                 | Second Reduction | Oxidation       |                 |
|-----------------------|-----------------|---------------|-----------------|-----------------|------------------|-----------------|-----------------|
|                       | $E_{pa}$ (V)    | $E_{1/2}$ (V) | $E_{onset}$ (V) | $E_{LUMO}$ (eV) | $E_{pa}$ (V)     | $E_{onset}$ (V) | $E_{HOMO}$ (eV) |
| <b>G</b> <sup>5</sup> | -2.00           | -1.92         | -1.85           | -2.95           | -2.65            | –               | –               |
| <b>4</b>              | -1.73           | -1.65         | -1.57           | -3.23           | -1.96            | 0.85            | -5.65           |
| <b>5</b>              | -1.73           | -1.65         | -1.58           | -3.22           | -2.30            | 0.88            | -5.68           |
| <b>8</b>              | -1.56           | –             | -1.41           | -3.39           | -2.12            | 0.89            | -5.69           |
| <b>9</b>              | -1.63           | –             | -1.39           | -3.42           | –                | 0.90            | -5.70           |
| <b>J</b> <sup>5</sup> | -1.46           | -1.39         | -1.32           | -3.48           | -1.93            | –               | –               |

Measured in THF (1 mM) with [<sup>n</sup>Bu<sub>4</sub>N][PF<sub>6</sub>] (0.1 M) as the supporting electrolyte at a scan rate of 50 mV/s. Potentials are given relative to the Fc/Fc<sup>+</sup> redox couple.  $E_{LUMO} = -4.8$  eV – (onset of first reduction) as Fc/Fc<sup>+</sup> is taken to be  $-4.8$  eV vs vacuum level.<sup>1</sup> No oxidation waves are observed within the potential window on THF for **G** and **J**.<sup>5</sup> Oxidation waves for **4**, **5**, **8** and **9** were unstable with cycling. The first reduction wave of each compound was reversible to at least 10 cycles, except for compound **9** which was unstable with cycling

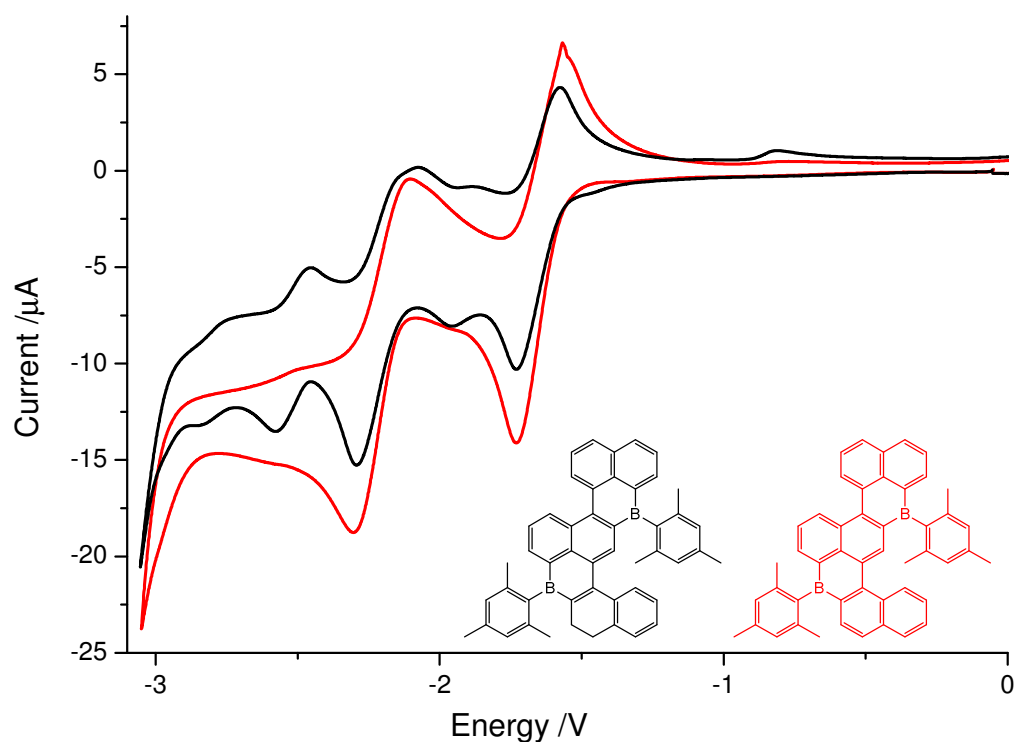

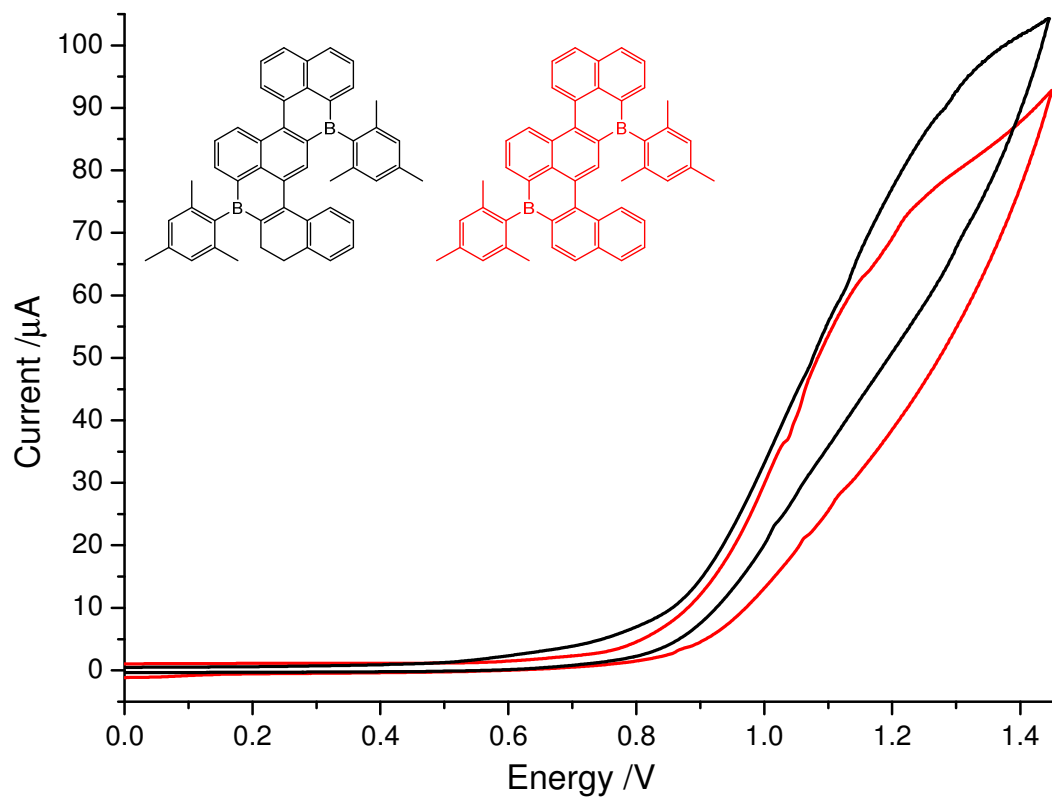

**Figure S7** Cyclic Voltammetry plots of **5** and **6**. Measured in THF (1 mM), with  $[\text{Bu}_4\text{N}][\text{PF}_6]$  (0.1 M) as the supporting electrolyte at a scan rate of 50 mV/s.

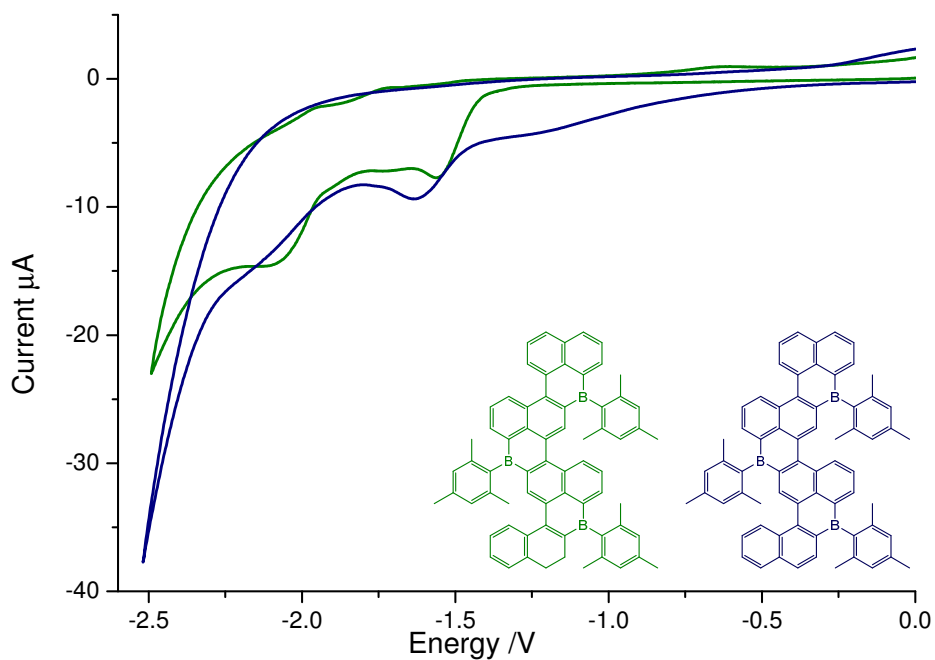

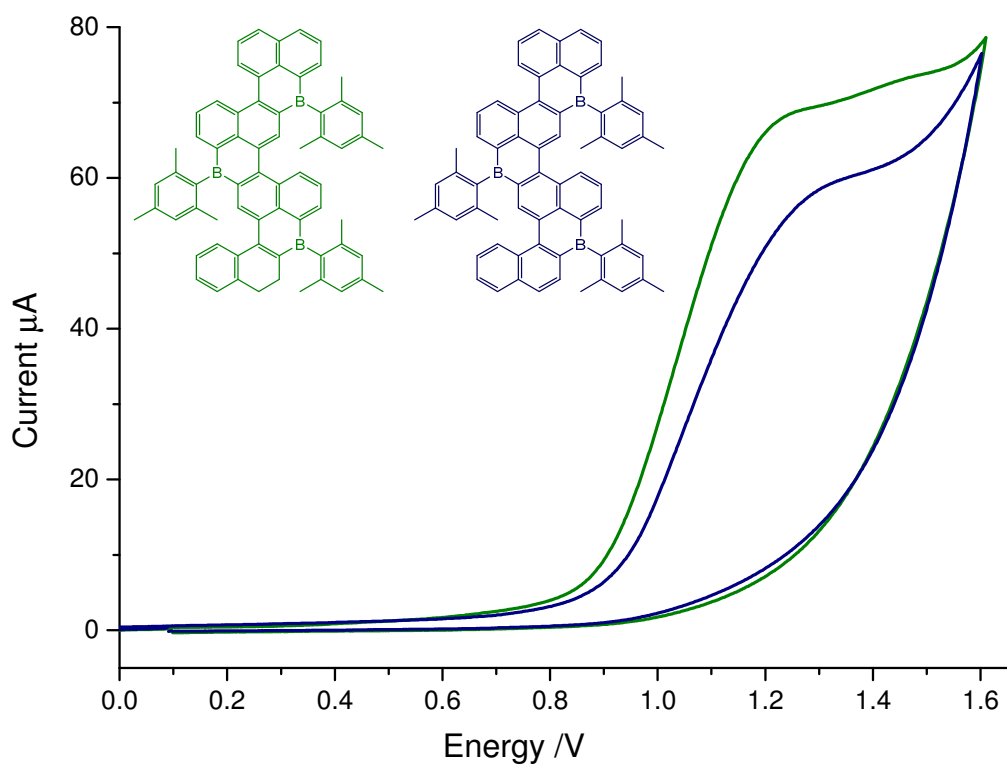

**Figure S8** Cyclic Voltammetry plots of **9** and **10**. Measured in THF (1 mM), with  $[\text{nBu}_4\text{N}][\text{PF}_6]$  (0.1 M) as the supporting electrolyte at a scan rate of 50 mV/s.



## Optimised Structure Coordinates

### Compound 5

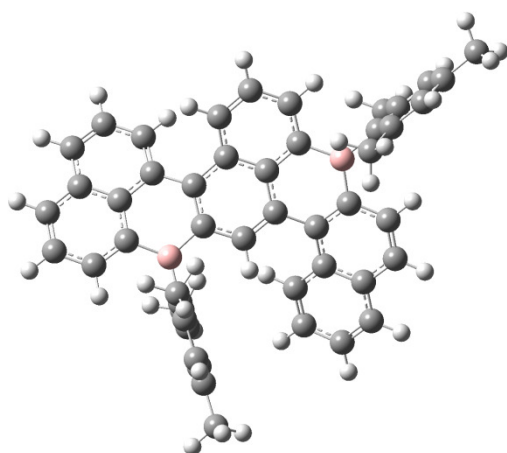

E(RM062X) = -1901.49419560

|   |          |           |           |
|---|----------|-----------|-----------|
| C | 3.626200 | 9.485300  | 15.514700 |
| C | 4.001300 | 8.607700  | 14.439200 |
| C | 6.361700 | 6.756400  | 18.704800 |
| C | 6.639900 | 6.347900  | 20.036900 |
| C | 7.186400 | 6.274700  | 17.643000 |
| C | 5.050800 | 7.750500  | 14.690300 |
| H | 5.536700 | 7.241100  | 13.866400 |
| C | 2.860500 | 10.657600 | 15.241900 |
| C | 3.428100 | 8.743700  | 13.082900 |
| C | 5.217700 | 7.585900  | 18.450500 |
| C | 4.949600 | 8.097600  | 17.091100 |
| C | 4.115100 | 9.245900  | 16.835100 |
| C | 7.445000 | 5.864000  | 14.942800 |
| C | 8.283200 | 5.483200  | 17.947600 |
| H | 8.888900 | 5.095200  | 17.133500 |
| C | 3.177500 | 7.934400  | 10.764600 |
| C | 2.606400 | 11.556400 | 16.268300 |
| H | 2.044100 | 12.458900 | 16.046800 |
| C | 2.837800 | 9.951800  | 12.703100 |
| C | 5.533800 | 7.468900  | 15.991300 |
| C | 3.867900 | 10.234800 | 17.822500 |
| H | 4.329100 | 10.135100 | 18.795400 |
| C | 7.458500 | 4.179200  | 13.201300 |
| H | 7.010400 | 3.299800  | 12.745900 |
| C | 2.713900 | 9.223900  | 10.386200 |
| C | 8.590200 | 6.436700  | 14.369400 |
| C | 1.725900 | 12.330100 | 13.418300 |
| C | 4.325700 | 7.795400  | 19.490200 |
| H | 3.386000 | 8.296100  | 19.297900 |
| C | 3.119200 | 11.357000 | 17.556500 |
| H | 2.968200 | 12.101700 | 18.328400 |
| C | 8.595800 | 4.742900  | 12.622800 |
| C | 7.797300 | 5.570500  | 20.295500 |
| H | 8.013400 | 5.293400  | 21.322100 |

|   |           |           |           |
|---|-----------|-----------|-----------|
| C | 9.149300  | 5.870800  | 13.222400 |
| H | 10.030000 | 6.328800  | 12.781300 |
| C | 2.491200  | 10.172000 | 11.338700 |
| H | 2.062100  | 11.131500 | 11.066900 |
| C | 3.481500  | 7.658900  | 12.129800 |
| C | 6.880700  | 4.721000  | 14.346500 |
| C | 4.584700  | 7.351400  | 20.802000 |
| H | 3.860700  | 7.552400  | 21.581900 |
| C | 8.616100  | 5.155300  | 19.275200 |
| H | 9.491300  | 4.553200  | 19.486600 |
| C | 5.742900  | 6.678100  | 21.083400 |
| H | 5.969300  | 6.354000  | 22.093300 |
| C | 0.323900  | 12.407400 | 13.467800 |
| C | 3.288100  | 6.903500  | 9.797000  |
| H | 3.081300  | 7.146300  | 8.760300  |
| C | 9.204000  | 7.672700  | 14.983900 |
| H | 8.460400  | 8.468900  | 15.087600 |
| H | 10.024400 | 8.053100  | 14.374400 |
| H | 9.592300  | 7.462300  | 15.984900 |
| C | 2.457700  | 13.462600 | 13.025700 |
| C | 3.739900  | 6.302500  | 12.477400 |
| H | 3.838200  | 6.026900  | 13.517300 |
| C | -0.317900 | 13.598100 | 13.131800 |
| H | -1.403200 | 13.644100 | 13.166200 |
| C | 9.203400  | 4.136600  | 11.383500 |
| H | 8.446300  | 3.991400  | 10.609600 |
| H | 9.639700  | 3.158300  | 11.601900 |
| H | 9.989700  | 4.774200  | 10.977900 |
| C | 5.667400  | 4.066700  | 14.964300 |
| H | 5.931100  | 3.576700  | 15.906800 |
| H | 5.240300  | 3.313200  | 14.300800 |
| H | 4.889300  | 4.800400  | 15.196400 |
| B | 6.741300  | 6.520800  | 16.186900 |
| C | 3.618800  | 5.625700  | 10.161400 |
| H | 3.696300  | 4.845000  | 9.414100  |
| C | 0.400400  | 14.729800 | 12.747400 |
| C | -0.478500 | 11.196800 | 13.882100 |
| H | -0.220800 | 10.328600 | 13.267600 |
| H | -1.549900 | 11.376400 | 13.785900 |
| H | -0.269800 | 10.929000 | 14.922500 |
| C | 3.811400  | 5.318300  | 11.525200 |
| H | 3.999900  | 4.294400  | 11.826500 |
| B | 2.476100  | 10.994400 | 13.784000 |
| C | 3.965300  | 13.397000 | 12.964600 |
| H | 4.295600  | 12.584200 | 12.310300 |
| H | 4.387800  | 13.204200 | 13.955800 |
| H | 4.389800  | 14.329500 | 12.590900 |
| C | 1.790000  | 14.642300 | 12.697500 |
| H | 2.367100  | 15.511400 | 12.393200 |
| C | -0.309800 | 16.018300 | 12.418400 |
| H | -1.253700 | 15.827300 | 11.904700 |
| H | 0.306300  | 16.656800 | 11.783600 |
| H | -0.539100 | 16.577200 | 13.330100 |
| H | 2.494400  | 9.412900  | 9.341000  |

Compound 9

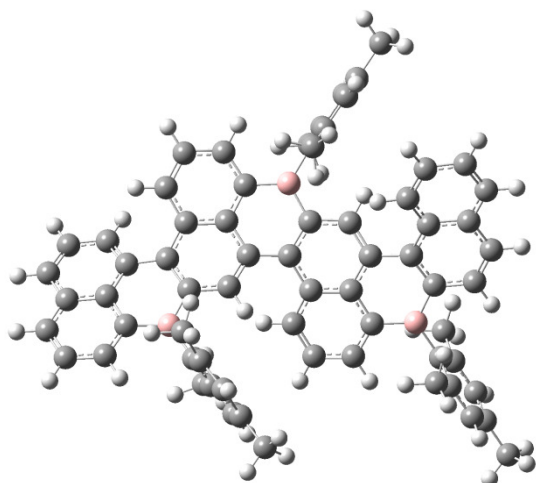

E(RM062X) = -2659.33491548

|   |          |           |           |
|---|----------|-----------|-----------|
| C | 3.725300 | 9.580200  | 15.539900 |
| C | 4.071800 | 8.705500  | 14.451800 |
| C | 6.350100 | 6.703500  | 18.715700 |
| C | 6.634300 | 6.314300  | 20.059700 |
| C | 7.067000 | 6.104700  | 17.636300 |
| C | 5.083300 | 7.800600  | 14.691300 |
| H | 5.543900 | 7.277600  | 13.861400 |
| C | 2.989500 | 10.775700 | 15.285300 |
| C | 3.505500 | 8.881900  | 13.097400 |
| C | 5.269500 | 7.615500  | 18.449100 |
| C | 5.007500 | 8.131600  | 17.095500 |
| C | 4.207100 | 9.308700  | 16.856200 |
| C | 7.338800 | 5.752000  | 14.930600 |
| C | 8.015100 | 5.128900  | 17.909700 |
| H | 8.534900 | 4.658300  | 17.080100 |
| C | 3.229300 | 8.116200  | 10.767100 |
| C | 2.743200 | 11.657300 | 16.328600 |
| H | 2.200200 | 12.574800 | 16.121400 |
| C | 2.961800 | 10.116700 | 12.734300 |
| C | 5.553000 | 7.482400  | 15.988600 |
| C | 3.973000 | 10.283500 | 17.861000 |
| H | 4.430100 | 10.159700 | 18.832900 |
| C | 7.272800 | 4.113300  | 13.147100 |
| H | 6.780100 | 3.271900  | 12.666200 |
| C | 2.819100 | 9.428700  | 10.406200 |
| C | 8.517400 | 6.276100  | 14.377300 |
| C | 1.914600 | 12.513000 | 13.486600 |
| C | 4.387500 | 7.843300  | 19.484400 |
| H | 3.435300 | 8.320000  | 19.280600 |
| C | 3.239900 | 11.420800 | 17.616600 |
| H | 3.093600 | 12.149800 | 18.404700 |
| C | 8.442800 | 4.628300  | 12.589200 |
| C | 7.575900 | 5.272200  | 20.263200 |
| H | 7.716500 | 4.876500  | 21.259600 |
| C | 9.052800 | 5.709700  | 13.219900 |

|   |           |           |           |
|---|-----------|-----------|-----------|
| H | 9.960700  | 6.129400  | 12.796000 |
| C | 2.629200  | 10.370400 | 11.372100 |
| H | 2.237900  | 11.349500 | 11.113800 |
| C | 3.517400  | 7.809100  | 12.129000 |
| C | 6.717800  | 4.656700  | 14.303400 |
| C | 4.663500  | 7.504400  | 20.830300 |
| C | 8.261400  | 4.697200  | 19.218900 |
| H | 8.956500  | 3.888600  | 19.408500 |
| C | 5.873000  | 6.883100  | 21.145500 |
| C | 0.515300  | 12.627800 | 13.534500 |
| C | 3.299900  | 7.095100  | 9.785600  |
| H | 3.107100  | 7.360400  | 8.751700  |
| C | 9.188200  | 7.465400  | 15.023200 |
| H | 8.517900  | 8.330700  | 15.038300 |
| H | 10.094400 | 7.750000  | 14.487400 |
| H | 9.457800  | 7.247900  | 16.060900 |
| C | 2.678100  | 13.631700 | 13.114900 |
| C | 3.715000  | 6.438400  | 12.458700 |
| H | 3.796200  | 6.144200  | 13.495300 |
| C | -0.093000 | 13.841100 | 13.217400 |
| H | -1.176700 | 13.916400 | 13.250300 |
| C | 9.028600  | 4.018000  | 11.341500 |
| H | 8.259900  | 3.875600  | 10.578800 |
| H | 9.463700  | 3.037900  | 11.554800 |
| H | 9.812800  | 4.650700  | 10.924300 |
| C | 5.468400  | 4.053400  | 14.900600 |
| H | 5.709100  | 3.488500  | 15.806800 |
| H | 4.979700  | 3.373300  | 14.201300 |
| H | 4.748200  | 4.824400  | 15.191300 |
| B | 6.668600  | 6.431700  | 16.181800 |
| C | 3.573800  | 5.799300  | 10.133200 |
| H | 3.620200  | 5.026300  | 9.375500  |
| C | 0.656900  | 14.959100 | 12.854100 |
| C | -0.321400 | 11.433500 | 13.927900 |
| H | -0.079500 | 10.565400 | 13.306800 |
| H | -1.386900 | 11.641000 | 13.823400 |
| H | -0.129800 | 11.149300 | 14.967200 |
| C | 3.747100  | 5.465000  | 11.493200 |
| H | 3.888200  | 4.429700  | 11.780900 |
| B | 2.625600  | 11.150400 | 13.831800 |
| C | 4.183600  | 13.526200 | 13.056600 |
| H | 4.493700  | 12.712900 | 12.393200 |
| H | 4.597800  | 13.309900 | 14.046400 |
| H | 4.634100  | 14.451500 | 12.695700 |
| C | 2.043700  | 14.834600 | 12.805500 |
| H | 2.645000  | 15.692600 | 12.516600 |
| C | -0.016600 | 16.272500 | 12.546600 |
| H | -0.972300 | 16.116400 | 12.043300 |
| H | 0.611200  | 16.898400 | 11.910700 |
| H | -0.216700 | 16.828600 | 13.466900 |
| H | 2.611000  | 9.641400  | 9.363100  |
| C | 6.312500  | 6.816300  | 22.553500 |
| C | 5.367300  | 6.987200  | 23.620700 |
| C | 7.653100  | 6.701500  | 22.886100 |
| C | 4.013800  | 7.366700  | 23.368000 |
| C | 5.806200  | 6.842200  | 24.964500 |

|   |           |           |           |
|---|-----------|-----------|-----------|
| C | 8.088300  | 6.599700  | 24.222000 |
| H | 8.401800  | 6.711100  | 22.105200 |
| C | 3.144500  | 7.511300  | 24.438200 |
| C | 4.864600  | 6.963900  | 26.017900 |
| C | 7.178500  | 6.624300  | 25.244400 |
| H | 9.146500  | 6.497100  | 24.427500 |
| C | 3.553300  | 7.279300  | 25.764500 |
| H | 2.123700  | 7.827600  | 24.242200 |
| H | 5.209500  | 6.820100  | 27.036600 |
| H | 7.495500  | 6.520400  | 26.276200 |
| H | 2.846300  | 7.381300  | 26.578500 |
| B | 3.605100  | 7.752900  | 21.932300 |
| C | 2.197600  | 8.351900  | 21.565000 |
| C | 2.049900  | 9.734600  | 21.360000 |
| C | 1.088000  | 7.511500  | 21.371100 |
| C | 0.815800  | 10.250800 | 20.966300 |
| C | -0.134800 | 8.056100  | 20.982800 |
| C | -0.290400 | 9.425800  | 20.775500 |
| H | 0.716800  | 11.320300 | 20.800500 |
| H | -0.982800 | 7.395300  | 20.825200 |
| C | 1.230600  | 6.019600  | 21.560100 |
| H | 1.495400  | 5.777900  | 22.593500 |
| H | 0.304900  | 5.498000  | 21.315000 |
| H | 2.024500  | 5.619200  | 20.921800 |
| C | 3.215000  | 10.666100 | 21.598300 |
| H | 3.030000  | 11.653200 | 21.171900 |
| H | 3.393900  | 10.791700 | 22.670800 |
| H | 4.141000  | 10.273600 | 21.167500 |
| C | -1.625600 | 10.001300 | 20.378200 |
| H | -1.502200 | 10.915900 | 19.796100 |
| H | -2.201500 | 9.288800  | 19.785700 |
| H | -2.217200 | 10.250300 | 21.263900 |

**Compound 10**

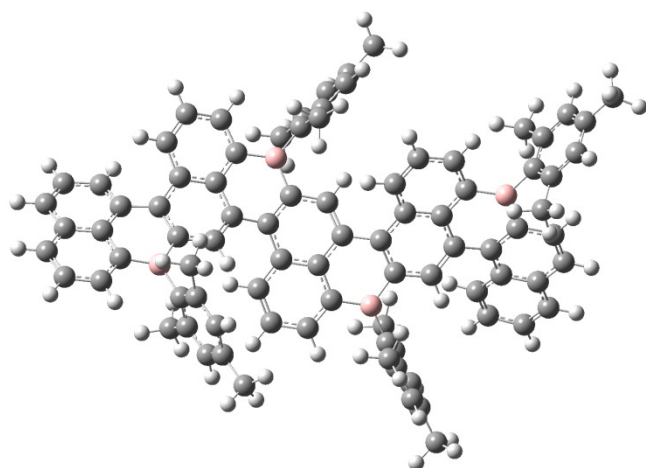

E(RM062X) = -3417.17570568

|   |          |           |           |
|---|----------|-----------|-----------|
| C | 3.612900 | 9.521700  | 15.569900 |
| C | 3.893100 | 8.620600  | 14.482800 |
| C | 6.244300 | 6.582600  | 18.683800 |
| C | 6.553200 | 6.190300  | 20.021300 |
| C | 6.903000 | 5.947800  | 17.588400 |
| C | 4.882500 | 7.683600  | 14.694800 |
| H | 5.291400 | 7.136100  | 13.852900 |
| C | 2.895500 | 10.732100 | 15.331100 |
| C | 3.282400 | 8.797500  | 13.155100 |
| C | 5.196900 | 7.539900  | 18.443800 |
| C | 4.906500 | 8.049400  | 17.094000 |
| C | 4.140400 | 9.252800  | 16.868900 |
| C | 7.118200 | 5.605700  | 14.876800 |
| C | 7.812800 | 4.930300  | 17.840100 |
| H | 8.289600 | 4.435600  | 16.998700 |
| C | 2.905100 | 8.030800  | 10.823700 |
| C | 2.726100 | 11.637600 | 16.369500 |
| H | 2.198700 | 12.566600 | 16.172100 |
| C | 2.731200 | 10.029300 | 12.804400 |
| C | 5.389200 | 7.366900  | 15.977100 |
| C | 3.981900 | 10.249400 | 17.867200 |
| H | 4.474900 | 10.124500 | 18.821200 |
| C | 7.011200 | 3.983100  | 13.080700 |
| H | 6.503900 | 3.150800  | 12.599600 |
| C | 2.629500 | 9.387100  | 10.431100 |
| C | 8.295000 | 6.122500  | 14.312500 |
| C | 1.771500 | 12.455700 | 13.521900 |
| C | 4.364100 | 7.820800  | 19.506900 |
| H | 3.427300 | 8.336900  | 19.330800 |
| C | 3.276200 | 11.406900 | 17.636300 |
| H | 3.188000 | 12.151900 | 18.418000 |
| C | 8.179800 | 4.490300  | 12.512500 |
| C | 7.446900 | 5.103500  | 20.203900 |
| H | 7.596900 | 4.706400  | 21.198500 |
| C | 8.809300 | 5.560000  | 13.143900 |
| H | 9.716400 | 5.973300  | 12.712000 |
| C | 2.404700 | 10.286700 | 11.450600 |
| H | 1.973800 | 11.255400 | 11.226400 |
| C | 3.213300 | 7.730400  | 12.185400 |
| C | 6.477500 | 4.522300  | 14.249300 |
| C | 4.674500 | 7.488500  | 20.846500 |
| C | 8.072800 | 4.490400  | 19.143800 |
| H | 8.732700 | 3.649700  | 19.318600 |
| C | 5.861300 | 6.809100  | 21.126000 |
| C | 0.387800 | 12.631700 | 13.696900 |
| C | 2.763500 | 6.972200  | 9.877700  |
| C | 8.987000 | 7.299000  | 14.959400 |
| H | 8.328300 | 8.173000  | 14.985400 |
| H | 9.891900 | 7.575100  | 14.417000 |
| H | 9.263000 | 7.071700  | 15.993200 |
| C | 2.522700 | 13.493300 | 12.944500 |
| C | 3.316800 | 6.364300  | 12.555100 |
| H | 3.429900 | 6.108100  | 13.599100 |

|   |           |           |           |
|---|-----------|-----------|-----------|
| C | -0.216600 | 13.821200 | 13.294900 |
| H | -1.288800 | 13.942000 | 13.424500 |
| C | 8.744900  | 3.882800  | 11.253900 |
| H | 7.964000  | 3.739900  | 10.503900 |
| H | 9.185400  | 2.903300  | 11.458700 |
| H | 9.521100  | 4.517400  | 10.824700 |
| C | 5.230300  | 3.928700  | 14.860300 |
| H | 5.475400  | 3.369600  | 15.768800 |
| H | 4.732800  | 3.246200  | 14.169900 |
| H | 4.516400  | 4.705600  | 15.151300 |
| B | 6.481800  | 6.287500  | 16.144000 |
| C | 2.935200  | 5.659700  | 10.295500 |
| H | 2.802700  | 4.859600  | 9.572900  |
| C | 0.519700  | 14.854000 | 12.716000 |
| C | -0.440700 | 11.524200 | 14.303900 |
| H | -0.304500 | 10.586900 | 13.755400 |
| H | -1.502800 | 11.771400 | 14.293300 |
| H | -0.144400 | 11.335900 | 15.340100 |
| C | 3.203800  | 5.349100  | 11.634400 |
| H | 3.272200  | 4.317000  | 11.956800 |
| B | 2.460900  | 11.090300 | 13.894400 |
| C | 4.018700  | 13.353200 | 12.788300 |
| H | 4.296800  | 12.359600 | 12.425300 |
| H | 4.519000  | 13.488900 | 13.752500 |
| H | 4.419300  | 14.096100 | 12.096400 |
| C | 1.890100  | 14.671300 | 12.547000 |
| H | 2.479700  | 15.462500 | 12.091400 |
| C | -0.147400 | 16.142000 | 12.306300 |
| H | -1.168900 | 15.964900 | 11.965400 |
| H | 0.404200  | 16.633600 | 11.503500 |
| H | -0.196400 | 16.836800 | 13.149600 |
| C | 6.349900  | 6.739000  | 22.517300 |
| C | 5.457700  | 6.978600  | 23.616700 |
| C | 7.693900  | 6.553900  | 22.800700 |
| C | 4.119100  | 7.431600  | 23.409400 |
| C | 5.939700  | 6.828800  | 24.945200 |
| C | 8.174200  | 6.446500  | 24.120500 |
| H | 8.411600  | 6.510000  | 21.992400 |
| C | 3.301000  | 7.639600  | 24.509100 |
| C | 5.048000  | 7.019000  | 26.031200 |
| C | 7.307600  | 6.537500  | 25.176100 |
| H | 9.232100  | 6.287000  | 24.288000 |
| C | 3.747000  | 7.403100  | 25.822400 |
| H | 2.293300  | 8.011900  | 24.346600 |
| H | 5.423700  | 6.872100  | 27.038500 |
| H | 7.658700  | 6.430500  | 26.196500 |
| H | 3.078900  | 7.556200  | 26.660800 |
| B | 3.679700  | 7.823500  | 21.984600 |
| C | 2.309800  | 8.524700  | 21.658800 |
| C | 2.264200  | 9.913700  | 21.449200 |
| C | 1.134300  | 7.771600  | 21.498400 |
| C | 1.063700  | 10.521800 | 21.083400 |
| C | -0.052400 | 8.407100  | 21.137200 |
| C | -0.106900 | 9.783900  | 20.924400 |
| H | 1.043400  | 11.595100 | 20.914500 |
| H | -0.953500 | 7.814000  | 21.006300 |

|   |           |           |           |
|---|-----------|-----------|-----------|
| C | 1.167600  | 6.273900  | 21.692600 |
| H | 1.459500  | 6.016300  | 22.714800 |
| H | 0.193600  | 5.825800  | 21.493500 |
| H | 1.897900  | 5.810200  | 21.021700 |
| C | 3.503700  | 10.753300 | 21.650700 |
| H | 3.372500  | 11.759600 | 21.250200 |
| H | 3.738300  | 10.843200 | 22.716000 |
| H | 4.378900  | 10.304400 | 21.171400 |
| C | -1.403700 | 10.457600 | 20.554800 |
| H | -1.223300 | 11.385900 | 20.010700 |
| H | -2.022800 | 9.807600  | 19.934200 |
| H | -1.979400 | 10.704900 | 21.451200 |
| C | 2.412200  | 9.761600  | 9.017100  |
| C | 2.536000  | 11.130700 | 8.571000  |
| C | 2.059800  | 8.776600  | 8.091100  |
| C | 3.208300  | 12.151200 | 9.301800  |
| C | 2.036400  | 11.475400 | 7.281600  |
| C | 1.623100  | 9.153600  | 6.788100  |
| C | 3.270800  | 13.441700 | 8.841100  |
| H | 3.723700  | 11.901000 | 10.218000 |
| C | 2.085400  | 12.823600 | 6.844800  |
| C | 1.545900  | 10.461100 | 6.414400  |
| H | 1.328700  | 8.368000  | 6.099100  |
| C | 2.670200  | 13.794000 | 7.613600  |
| H | 3.801600  | 14.191300 | 9.416300  |
| H | 1.669500  | 13.064900 | 5.872600  |
| H | 1.167300  | 10.747800 | 5.439300  |
| H | 2.708700  | 14.819500 | 7.266300  |
| B | 2.254600  | 7.287900  | 8.453800  |
| C | 1.968500  | 6.145100  | 7.408300  |
| C | 0.656600  | 5.674400  | 7.223000  |
| C | 3.007200  | 5.583700  | 6.649700  |
| C | 0.406400  | 4.661600  | 6.299700  |
| C | 2.727300  | 4.574400  | 5.727600  |
| C | 1.431500  | 4.100600  | 5.538500  |
| H | -0.610200 | 4.300000  | 6.170100  |
| H | 3.539500  | 4.148100  | 5.145100  |
| C | -0.473900 | 6.268100  | 8.029500  |
| H | -0.273900 | 6.189300  | 9.102600  |
| H | -0.597700 | 7.331800  | 7.803100  |
| H | -1.418500 | 5.764200  | 7.822300  |
| C | 4.424400  | 6.071300  | 6.838300  |
| H | 4.480600  | 7.159500  | 6.735500  |
| H | 4.792600  | 5.823300  | 7.838400  |
| H | 5.099900  | 5.626000  | 6.107000  |
| C | 1.134300  | 3.027500  | 4.522000  |
| H | 0.396500  | 2.318800  | 4.903300  |
| H | 0.727100  | 3.463800  | 3.605600  |
| H | 2.036800  | 2.475600  | 4.255600  |



## References

1. C. M. Cardona, W. Li, A. E. Kaifer, D. Stockdale and G. C. Bazan, *Adv. Mater.*, 2011, **23**, 2367–2371.
2. Gaussian 09, Revision C1, Frisch, M. J.; Trucks, G. W.; Schlegel, H. B.; Scuseria, G. E.; Robb, M. A.; Cheeseman, J. R.; Scalmani, G.; Barone, V.; Mennucci, B.; Petersson, G. A.; Nakatsuji, H.; Caricato, M.; Li, X.; Hratchian, H. P.; Izmaylov, A. F.; Bloino, J.; Zheng, G.; Sonnenberg, J. L.; Hada, M.; Ehara, M.; Toyota, K.; Fukuda, R.; Hasegawa, J.; Ishida, M.; Nakajima, T.; Honda, Y.; Kitao, O.; Nakai, H.; Vreven, T.; Montgomery, Jr., J. A.; Peralta, J. E.; Ogliaro, F.; Bearpark, M.; Heyd, J. J.; Brothers, E.; Kudin, K. N.; Staroverov, V. N.; Kobayashi, R.; Normand, J.; Raghavachari, K.; Rendell, A.; Burant, J. C.; Iyengar, S. S.; Tomasi, J.; Cossi, M.; Rega, N.; Millam, J. M.; Klene, M.; Knox, J. E.; Cross, J. B.; Bakken, V.; Adamo, C.; Jaramillo, J.; Gomperts, R.; Stratmann, R. E.; Yazyev, O.; Austin, A. J.; Cammi, R.; Pomelli, C.; Ochterski, J. W.; Martin, R. L.; Morokuma, K.; Zakrzewski, V. G.; Voth, G. A.; Salvador, P.; Dannenberg, J. J.; Dapprich, S.; Daniels, A. D.; Farkas, Ö.; Foresman, J. B.; Ortiz, J. V.; Cioslowski, J.; Fox, D. J. Gaussian, Inc., Wallingford CT, **2009**.
3. Zhao Y.; Truhlar D. G., *Theor. Chem. Acc.* **2008**, *120*, 215.
4. Mennucci B.; Cancès E.; Tomasi J., *J. Phys. Chem. B* **1997**, *101*, 10506.
5. D. L. Crossley, R. J. Kahan, S. Endres, A. J. Warner, R. A. Smith, J. Cid, J. J. Dunsford, J. E. Jones, I. Vitorica-Yrezabal and M. J. Ingleson, *Chem. Sci.*, 2017, **8**, 7969–7977.
6. CrysAlisPro, Agilent Technologies, Version 1.171.35.19 (release 27-10-2011 CrysAlis171 .NET) (compiled Oct 27 2011,15:02:11).
7. O. V. Dolomanov, L. J. Bourhis, R. J. Gildea, J. A. K. Howard and H. Puschmann, *J. Appl. Crystallogr.* **2009**, *42*, 339–341.
8. L. Palatinus and G. Chapuis, *J. Appl. Crystallogr.*, **2007**, *40*, 786–790.
9. L. Palatinus and A. van der Lee, *J. Appl. Crystallogr.*, **2008**, *41*, 975–984.
10. L. Palatinus, S. J. Prathapa and S. van Smaalen, *J. Appl. Crystallogr.*, **2012**, *45*, 575–580.
11. G. M. Sheldrick, *Acta Cryst.* **2008**, *A64*, 112–122.
12. G. M. Sheldrick, *Acta Cryst.* **2015**, *A71*, 3–8.
13. G. M. Sheldrick, *Acta Cryst.* **2015**, *C71*, 3–8.
